# Supplementary material for: Meso-functionalization of calix[4]arene with 1,3,7-triazapyrene in the design of novel fluorophores with the dual target detection of Al3+ and Fe3+ cations
Source: Royal Society of Chemistry journal article supplement (doi:10.1039/d0ra10605d), 2021-01-01
Supplement: d0ra10605d1.pdf [file d0ra10605d1.pdf]

# Electronic Supplementary Information (ESI)

## ***Meso*-functionalization of calix[4]arene with 1,3,7-triazapyrene in the design of novel fluorophores with the dual target detection of Al<sup>3+</sup> and Fe<sup>3+</sup> cations**

Timofey D. Moseev,<sup>a</sup> Igor A. Lavrinchenko,<sup>a</sup> Mikhail V. Varaksin,<sup>a,b\*</sup>

Diana Yu. Pobedinskaya,<sup>c</sup> Oleg P. Demidov,<sup>c</sup> Ivan V. Borovlev,<sup>c</sup>

Valery N. Charushin,<sup>a,b</sup> and Oleg N. Chupakhin<sup>a,b\*</sup>

<sup>a</sup> Ural Federal University, 19 Mira Str., 620002 Ekaterinburg, Russia

<sup>b</sup> Institute of Organic Synthesis, Ural Branch of the Russian Academy of Sciences,  
22 S. Kovalevskaya Str., 620990 Ekaterinburg, Russia

<sup>c</sup> North-Caucasus Federal University, 355009 Stavropol, Russia

E-mail: [m.v.varaksin@urfu.ru](mailto:m.v.varaksin@urfu.ru)

E-mail: [chupakhin@ios.uran.ru](mailto:chupakhin@ios.uran.ru)

### TABLE OF CONTENTS

|                                                                                                                                                                                |     |
|--------------------------------------------------------------------------------------------------------------------------------------------------------------------------------|-----|
| 1. Copies of <sup>1</sup> H, <sup>13</sup> C NMR spectra for 2-(1,3,7-triazapyrene-6-yl)-5,11,17,23-tetra- <i>tert</i> -butyl-25,26,27,28-tetramethoxycalix[4]arene (4a) ..... | S2  |
| 2. Copies of <sup>1</sup> H, <sup>13</sup> C NMR spectra for 2-(1,3,7-triazapyrene-6-yl)-25,26,27,28-tetramethoxycalix[4]arene (4b) .....                                      | S6  |
| 3. Copies of <sup>1</sup> H, <sup>13</sup> C NMR spectra for 2-(1,3,7-triazapyrene-6-yl)-5,11,17,23-tetra- <i>tert</i> -butyl-25,26,27,28-tetrahydroxycalix[4]arene (5a) ..... | S10 |
| 4. Copies of <sup>1</sup> H, <sup>13</sup> C NMR spectra for 2-(1,3,7-triazapyrene-6-yl)-25,26,27,28-tetrahydroxycalix[4]arene (5b) .....                                      | S13 |
| 5. Photophysical studies .....                                                                                                                                                 | S20 |
| 5.1. Absorbance spectra .....                                                                                                                                                  | S20 |
| 5.2. Emission spectra .....                                                                                                                                                    | S23 |
| 5.3. Emission spectra in the presence of various metal ions .....                                                                                                              | S25 |
| 6. Determining the stoichiometry of ligand: metal complex .....                                                                                                                | S27 |
| 7. Binding constants measurement .....                                                                                                                                         | S28 |
| 8. Emission spectra depending on pH .....                                                                                                                                      | S31 |
| 9. References .....                                                                                                                                                            | S32 |

1. Copies of  $^1\text{H}$ ,  $^{13}\text{C}$  NMR spectra for 2-(1,3,7-triazapyrene-6-yl)-5,11,17,23-tetra-*tert*-butyl-25,26,27,28-tetramethoxycalix[4]arene (4a)

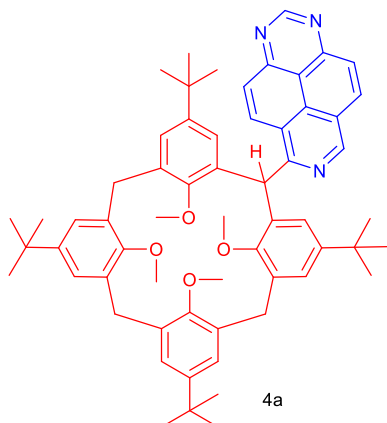

Spectrum S1.  $^1\text{H}$  NMR (400 MHz,  $\text{CDCl}_3$ ) of 4a

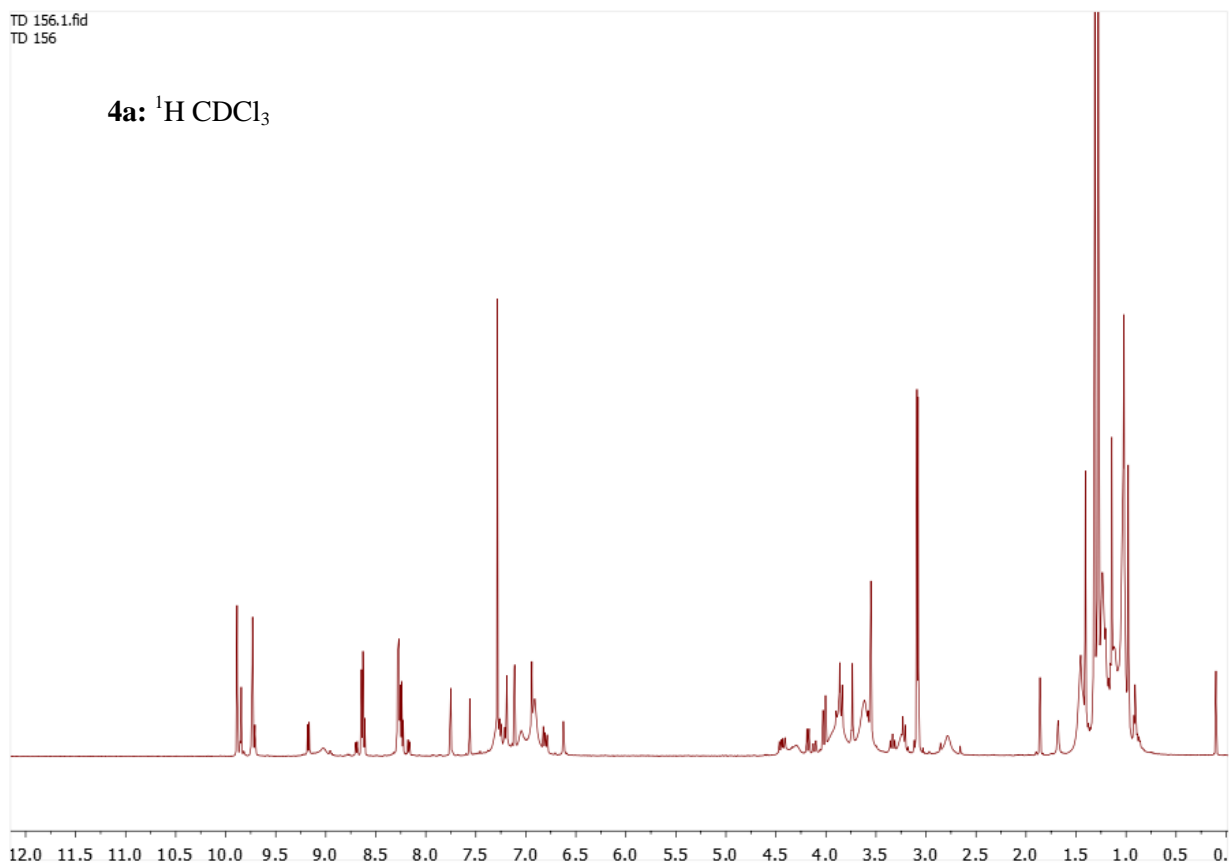

Spectrum S2.  $^1\text{H}$  NMR (400 MHz,  $\text{CDCl}_3$ ) of **4a** with addition of NaI

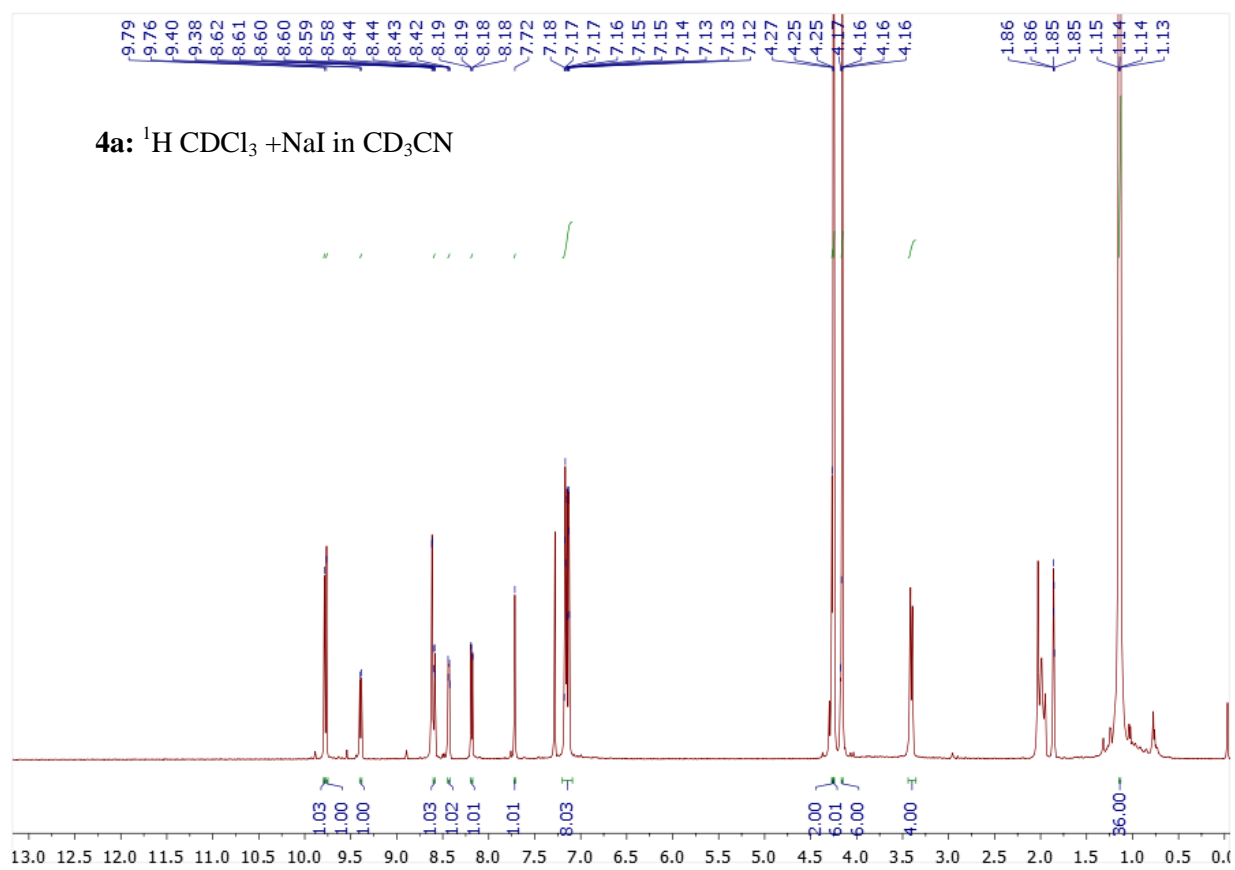

Spectrum S3.  $^{13}\text{C}\{^1\text{H}\}$  NMR (100 MHz,  $\text{CDCl}_3$ ) of **4a**

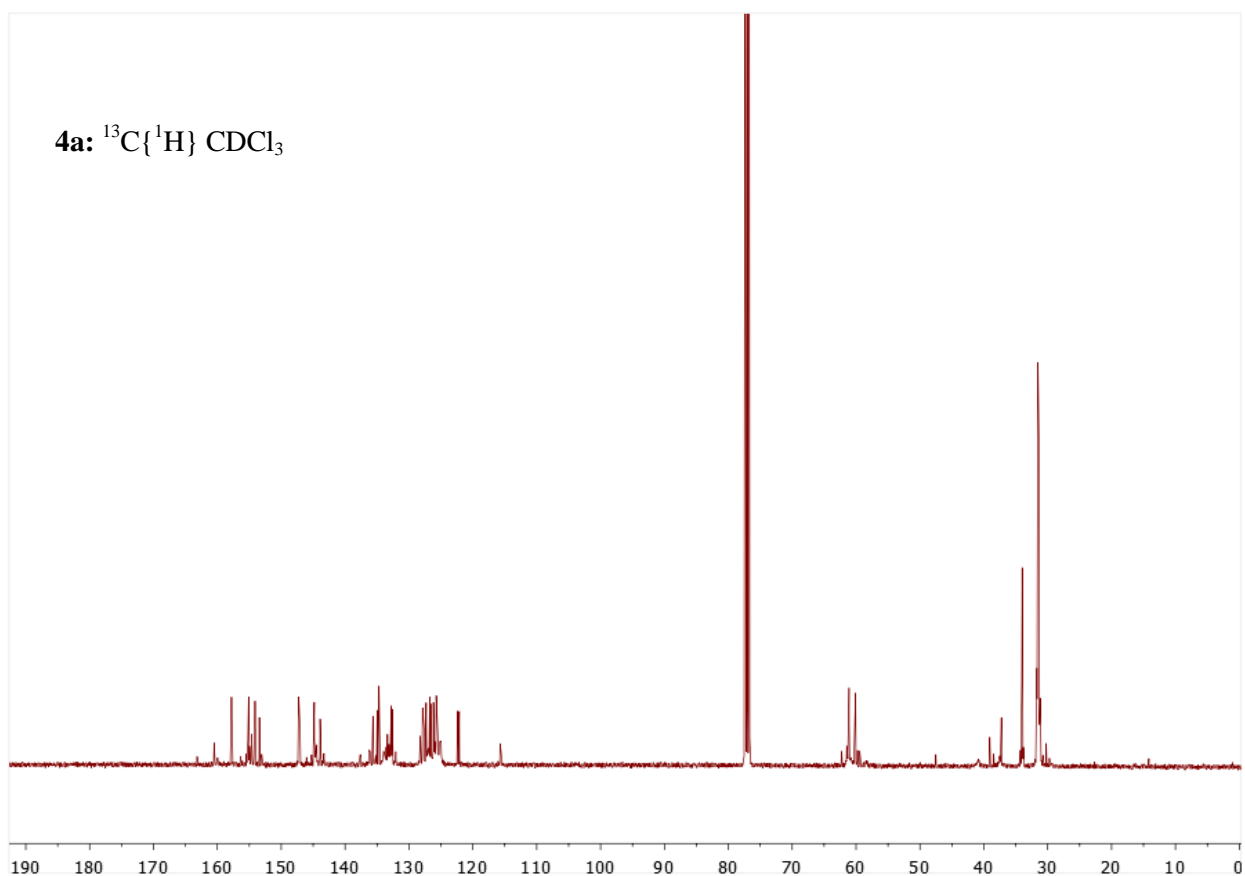

Spectrum S4.  $^{13}\text{C}\{^1\text{H}\}$  NMR (100 MHz,  $\text{CDCl}_3$ ) of **4a** with addition of NaI

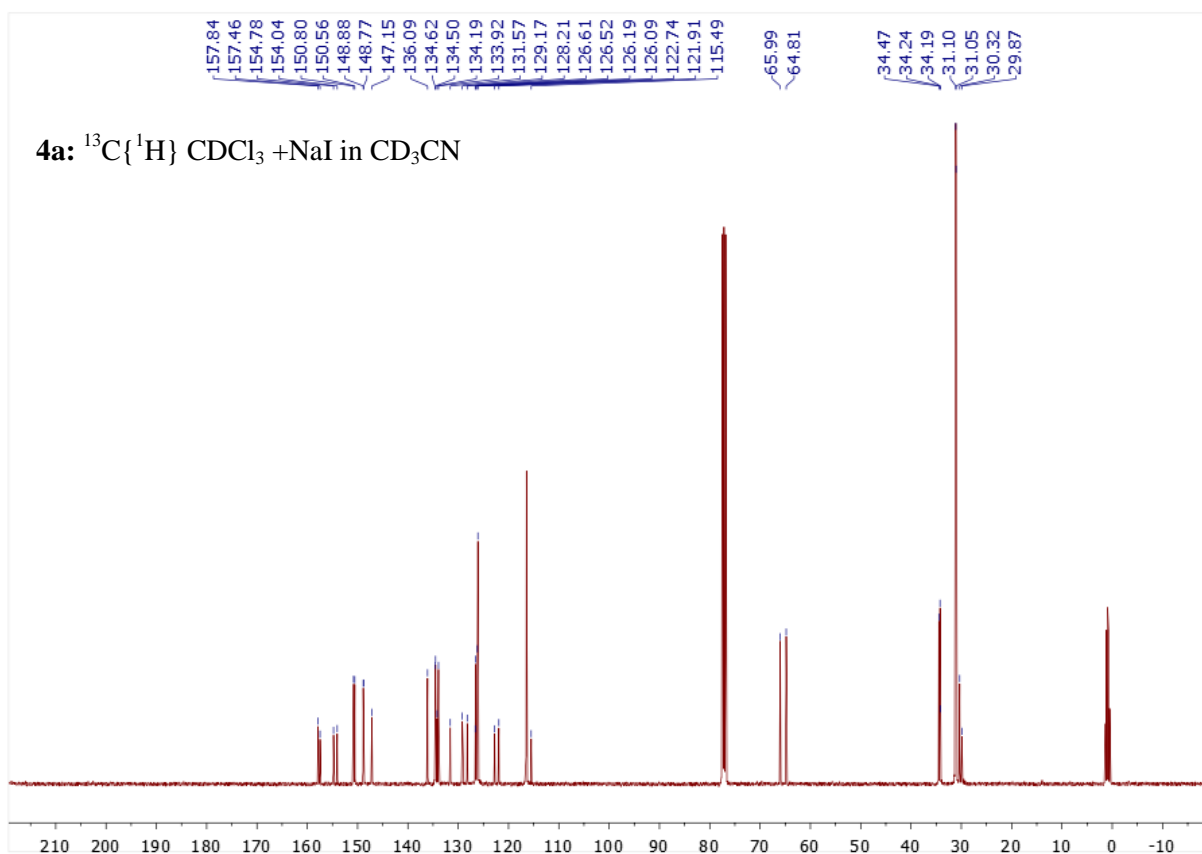

Spectrum S5.  $^1\text{H}$ - $^{13}\text{C}$  HSQC NMR ( $\text{CDCl}_3$ ) of **4a** with addition of NaI

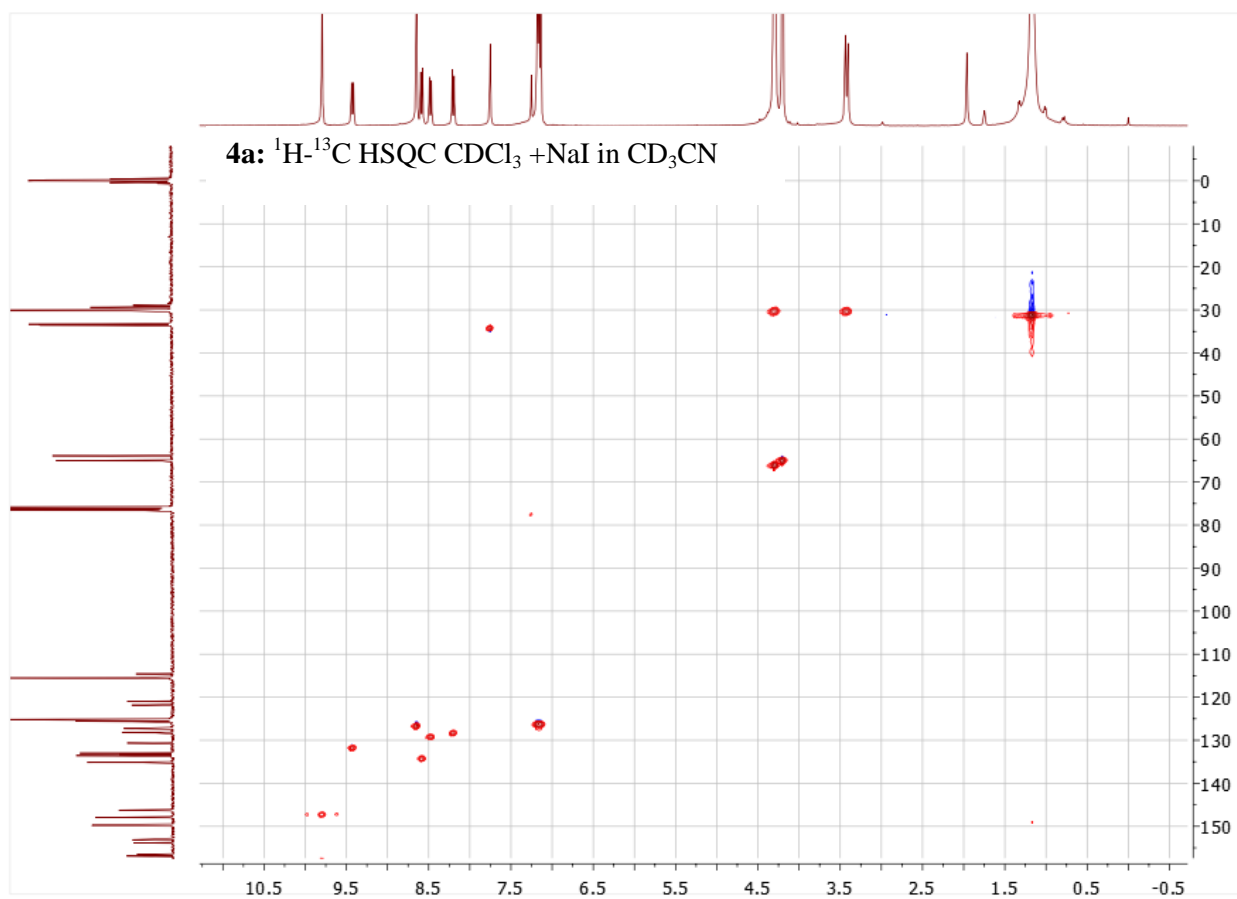

Spectrum S6.  $^1\text{H}$ - $^{13}\text{C}$  HMBC NMR ( $\text{CDCl}_3$ ) of **4a** with addition of NaI

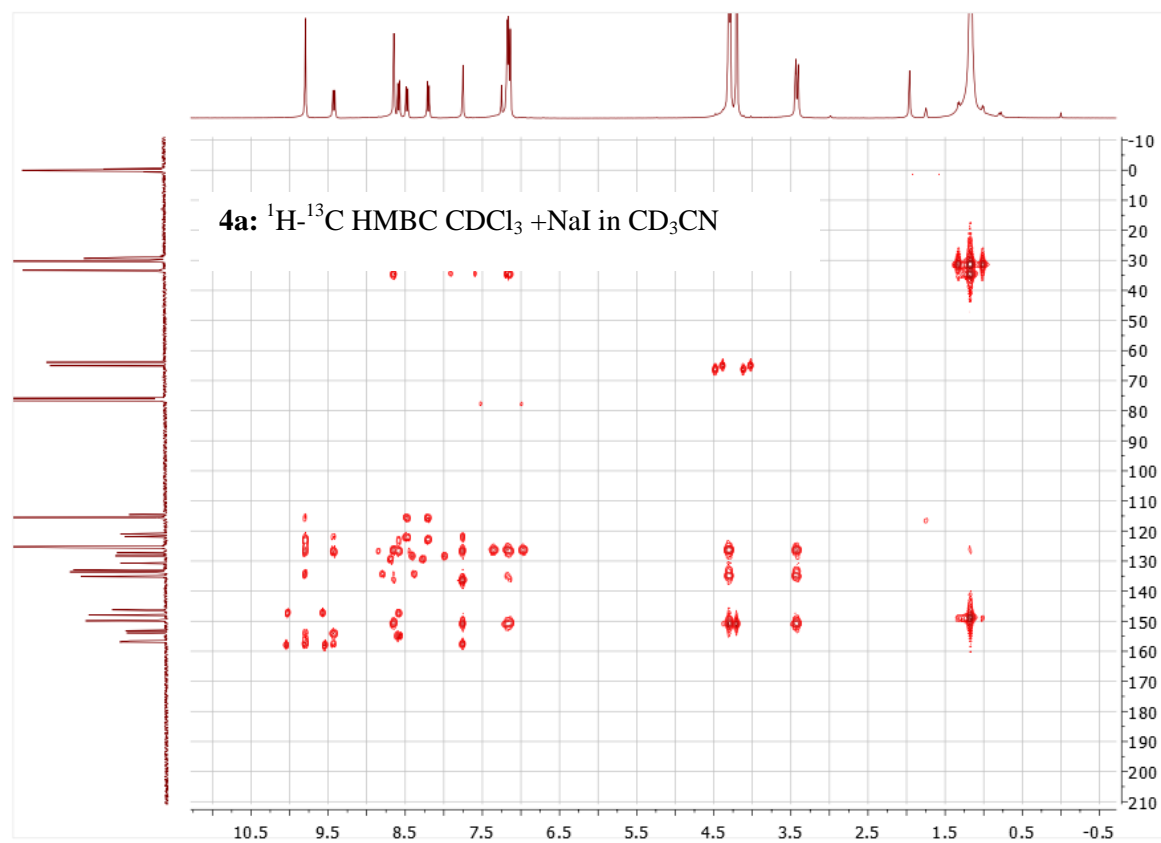

Spectrum S7.  $^1\text{H}$ - $^1\text{H}$  COSY NMR ( $\text{CDCl}_3$ ) of **4a** with addition of NaI

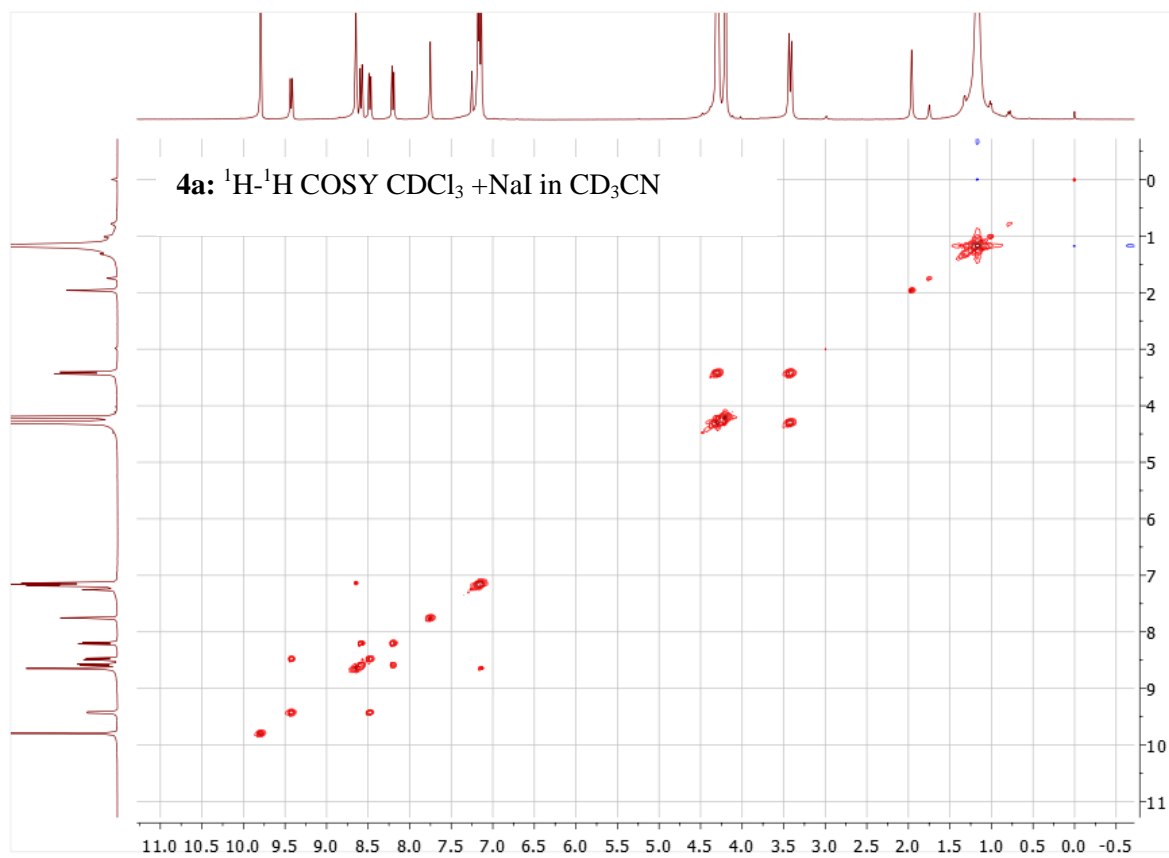

2. Copies of  $^1\text{H}$ ,  $^{13}\text{C}$  NMR spectra for 2-(1,3,7-triazapyrene-6-yl)-25,26,27,28-tetramethoxycalix[4]arene (**4b**)

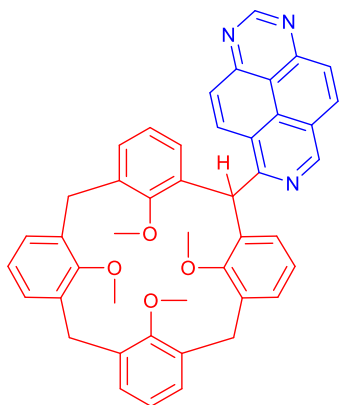

**4b**

Spectrum S8.  $^1\text{H}$  NMR (400 MHz,  $\text{CDCl}_3$ ) of **4b**

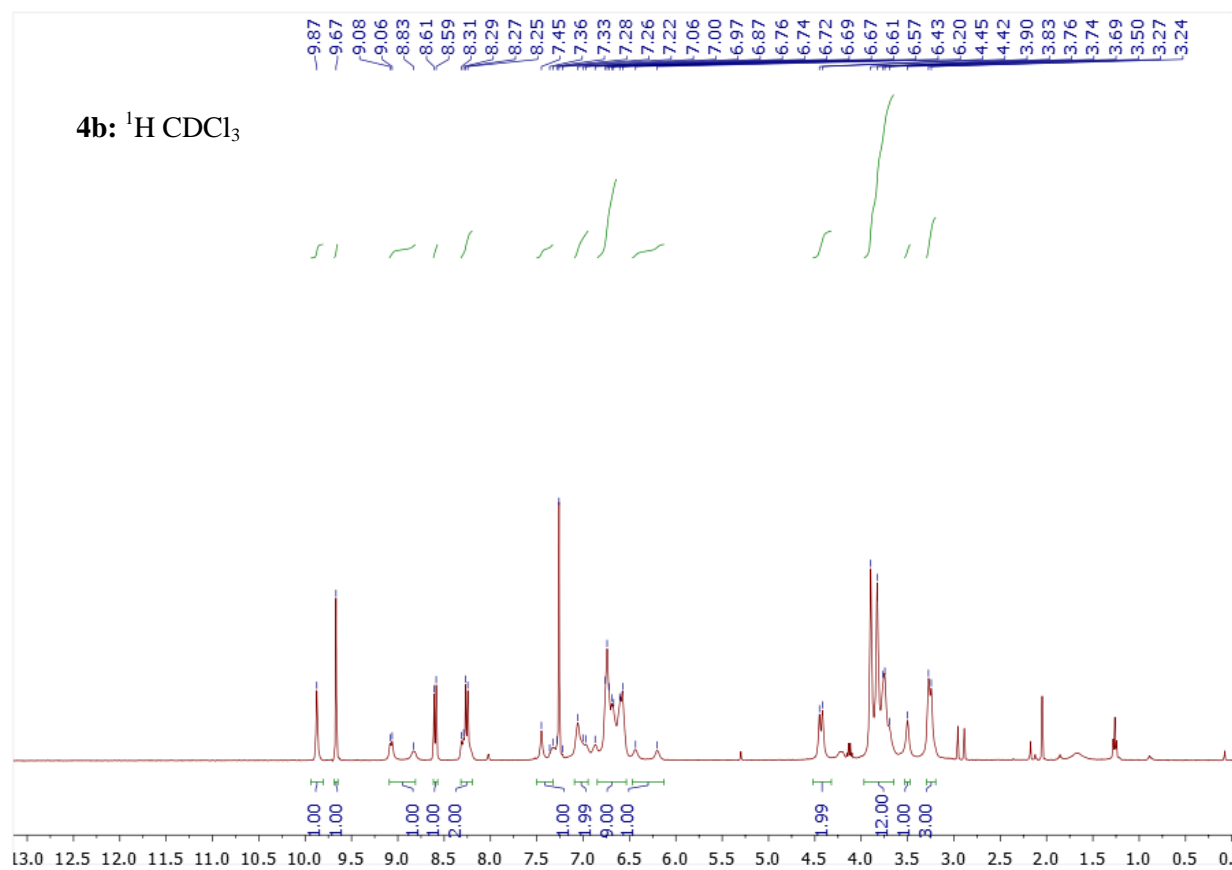

Spectrum S9.  $^1\text{H}$  NMR (400 MHz,  $\text{CDCl}_3$ ) of **4b** with addition of NaI

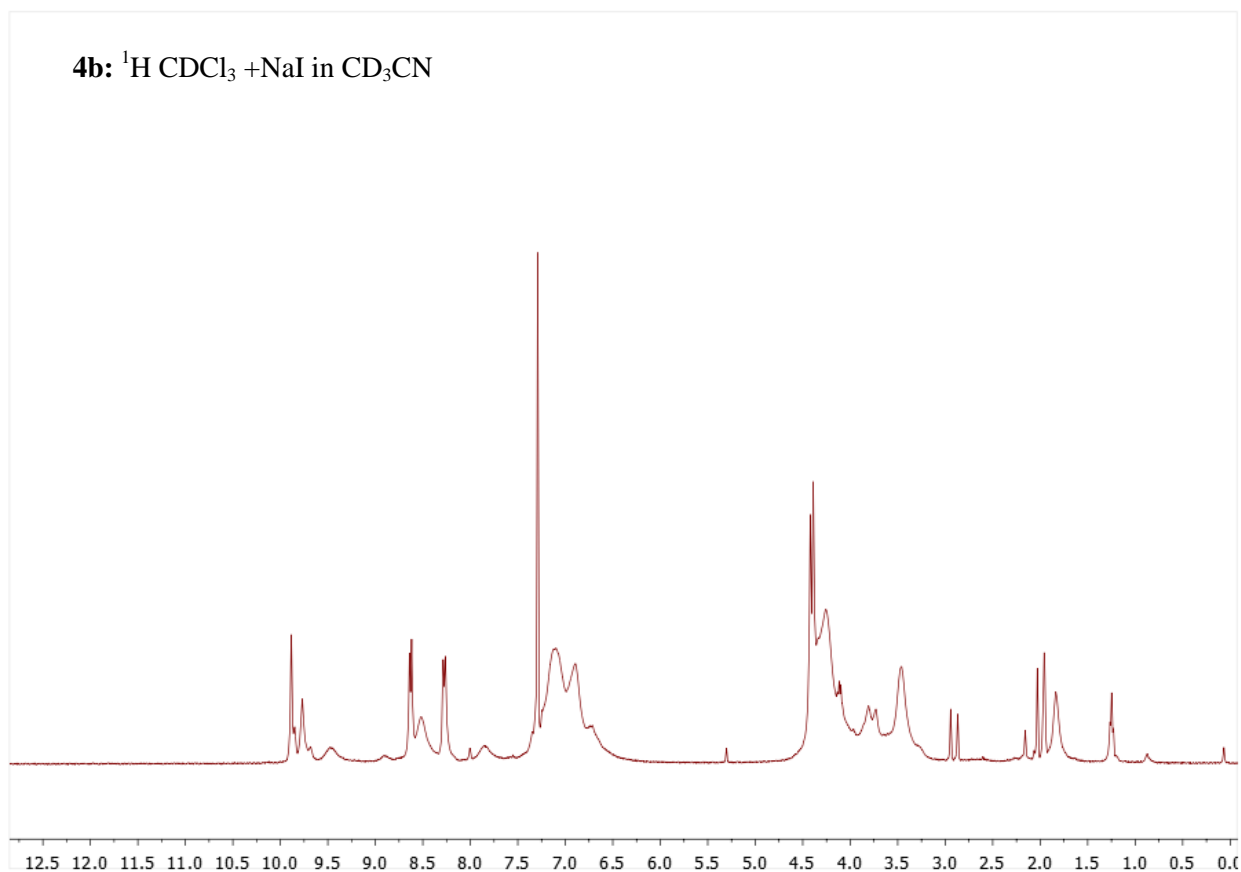

Spectrum S10.  $^{13}\text{C}\{^1\text{H}\}$  NMR (100 MHz,  $\text{CDCl}_3$ ) of **4b**

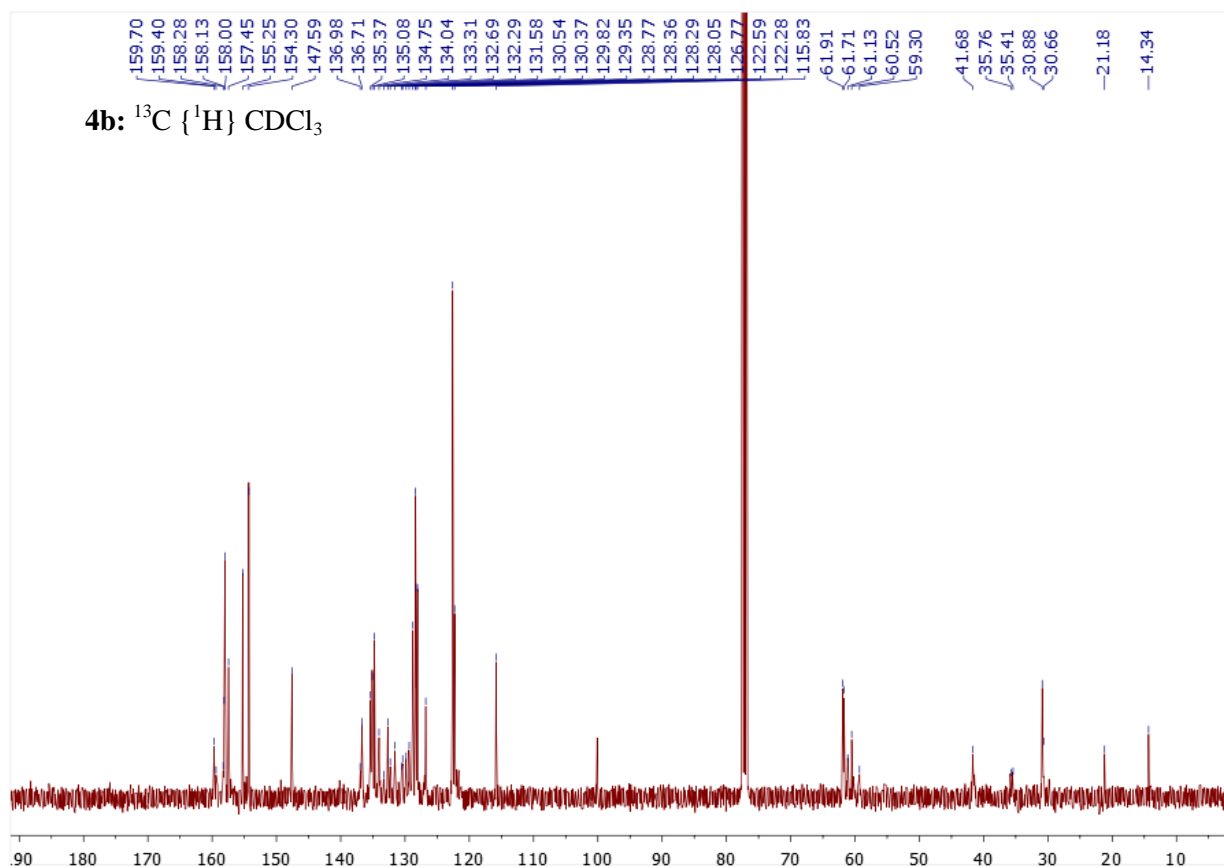

Spectrum S11.  $^1\text{H}$ - $^{13}\text{C}$  HSQC NMR ( $\text{CDCl}_3$ ) of **4b**

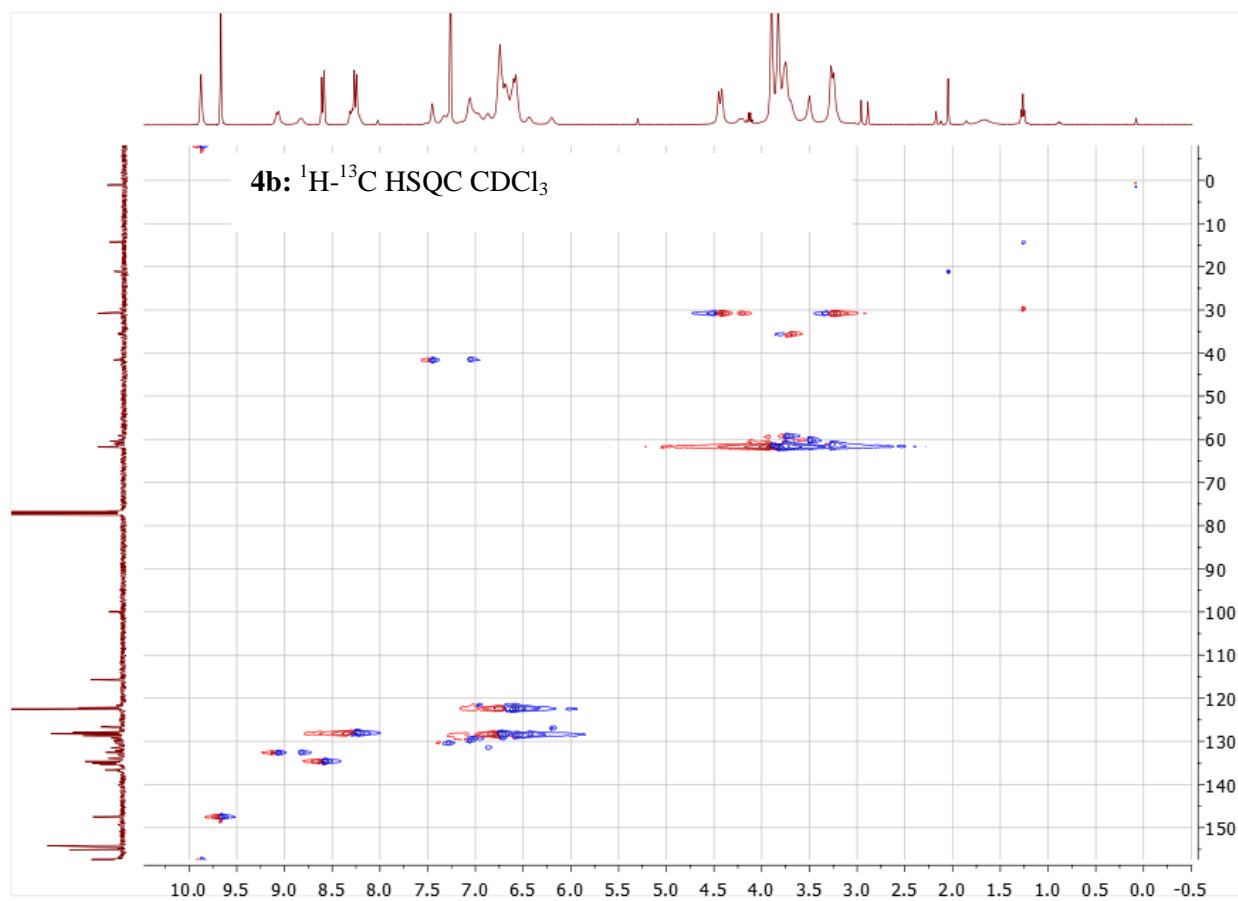

Spectrum S12.  $^1\text{H}$ - $^{13}\text{C}$  HMBC NMR ( $\text{CDCl}_3$ ) of **4b**

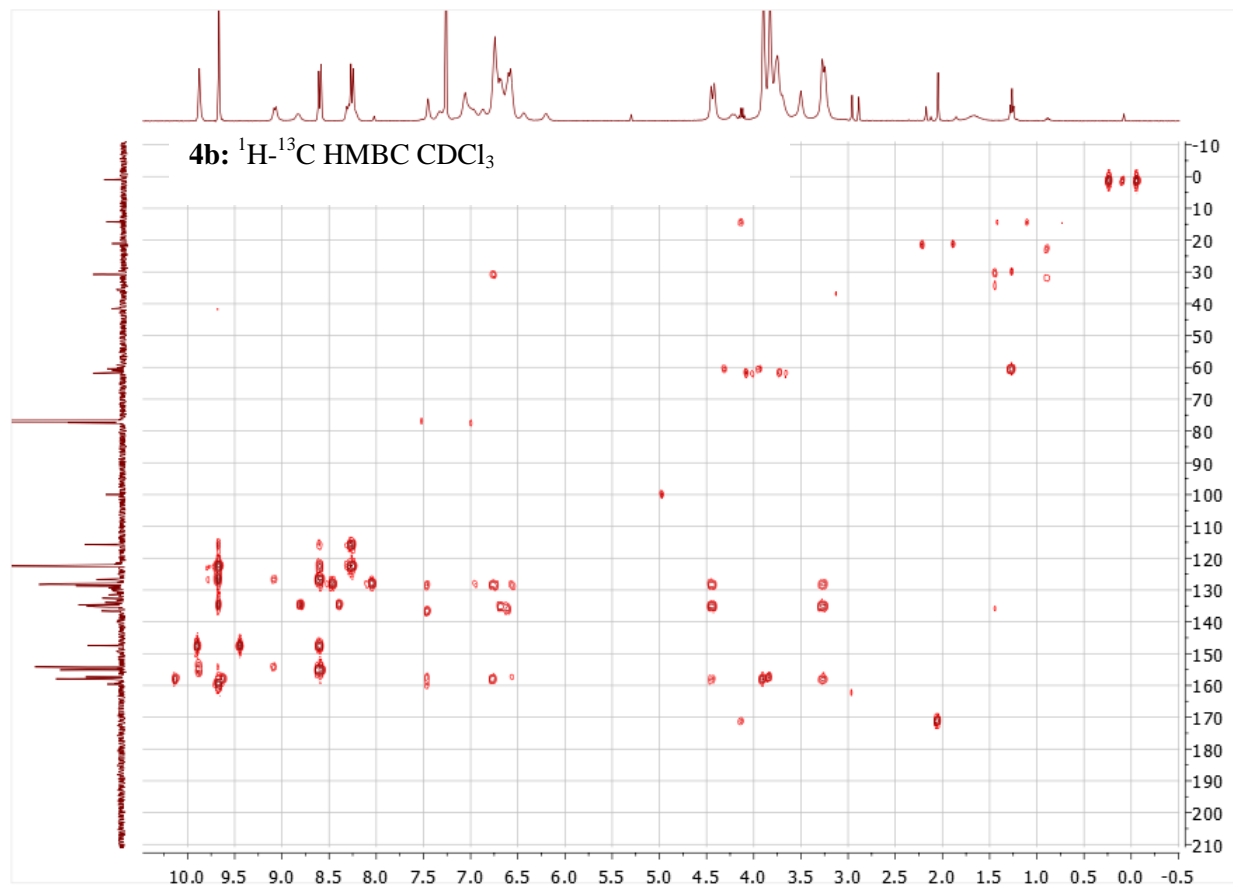



Spectrum S13.  $^1\text{H}$ - $^1\text{H}$  COSY NMR ( $\text{CDCl}_3$ ) of **4b**

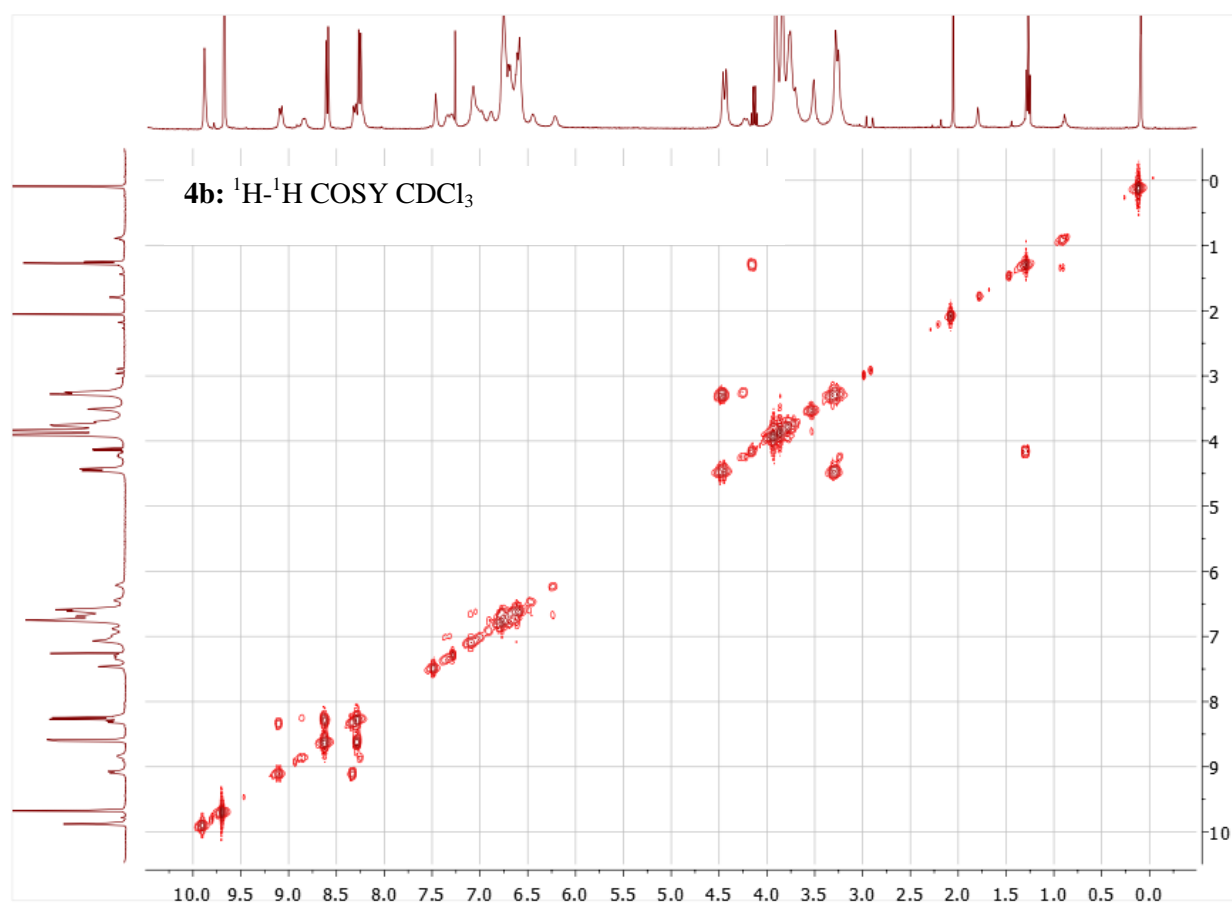

3. Copies of  $^1\text{H}$ ,  $^{13}\text{C}$  NMR spectra for 2-(1,3,7-triazapyrene-6-yl)-5,11,17,23-tetra-*tert*-butyl-25,26,27,28-tetrahydrocalix[4]arene (**5a**)

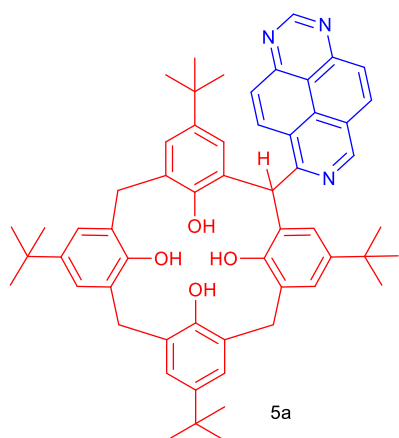

Spectrum S14.  $^1\text{H}$  NMR (400 MHz,  $\text{CDCl}_3$ ) of **5a**

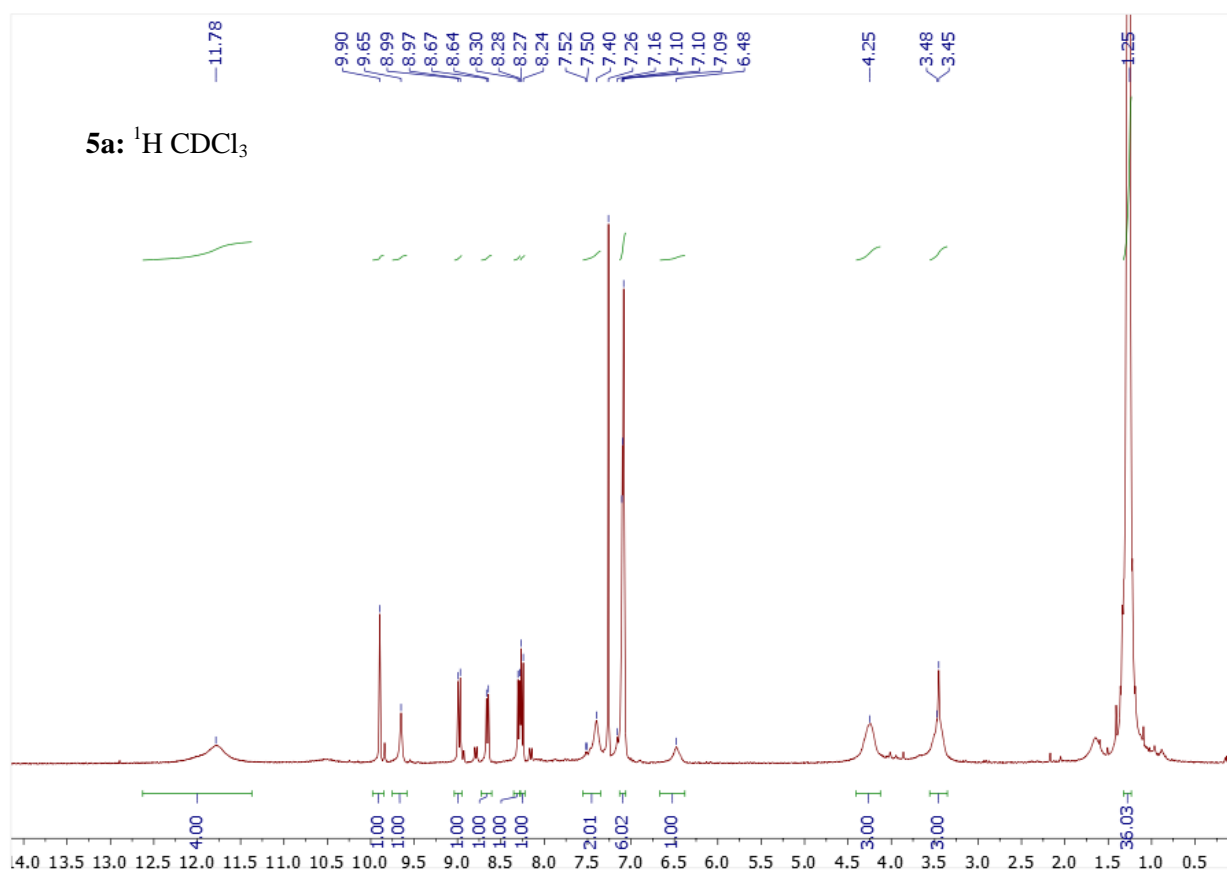

Spectrum S15.  $^{13}\text{C}$   $\{^1\text{H}\}$  NMR (100 MHz,  $\text{CDCl}_3$ ) of **5a**

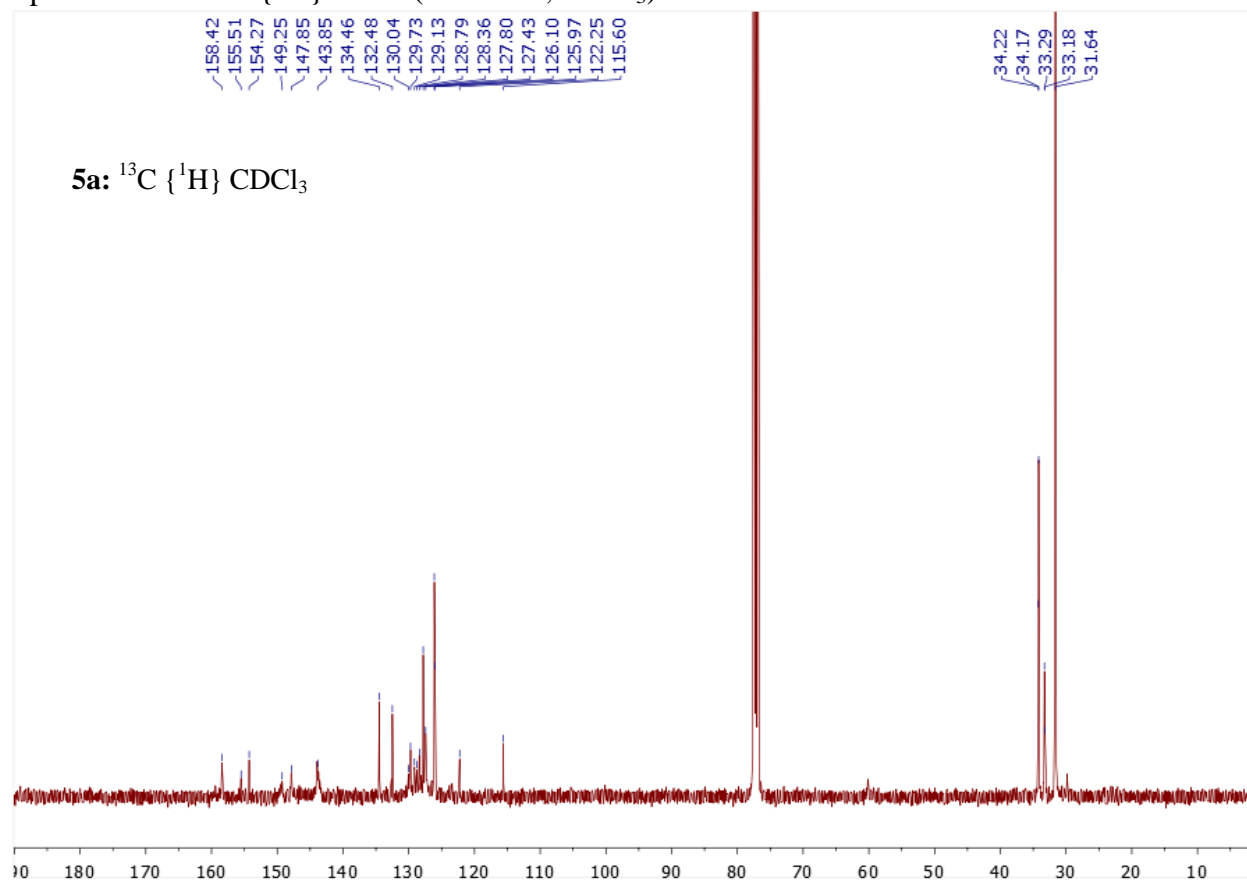

Spectrum S16.  $^1\text{H}$ - $^{13}\text{C}$  HSQC NMR ( $\text{CDCl}_3$ ) of **5a**

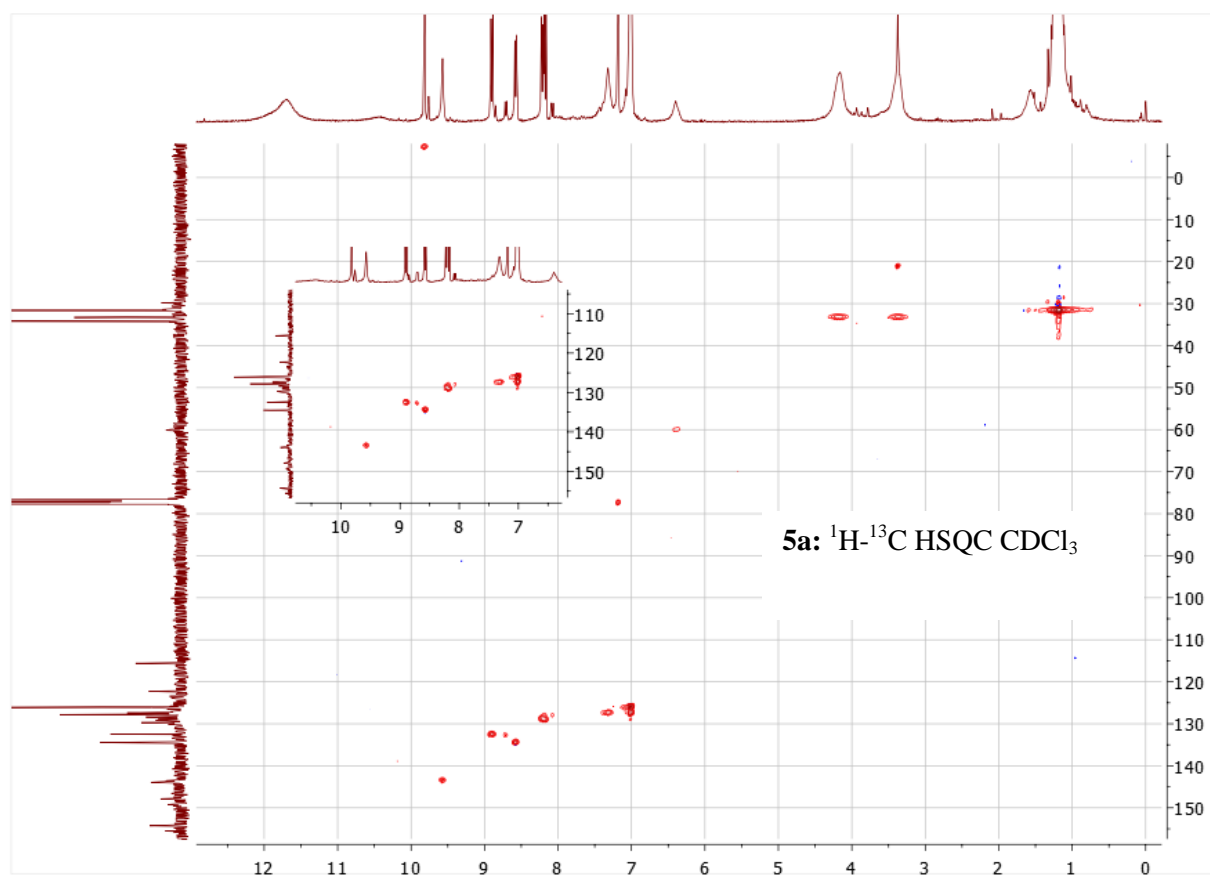

Spectrum S17.  $^1\text{H}$ - $^{13}\text{C}$  HMBC NMR ( $\text{CDCl}_3$ ) of **5a**

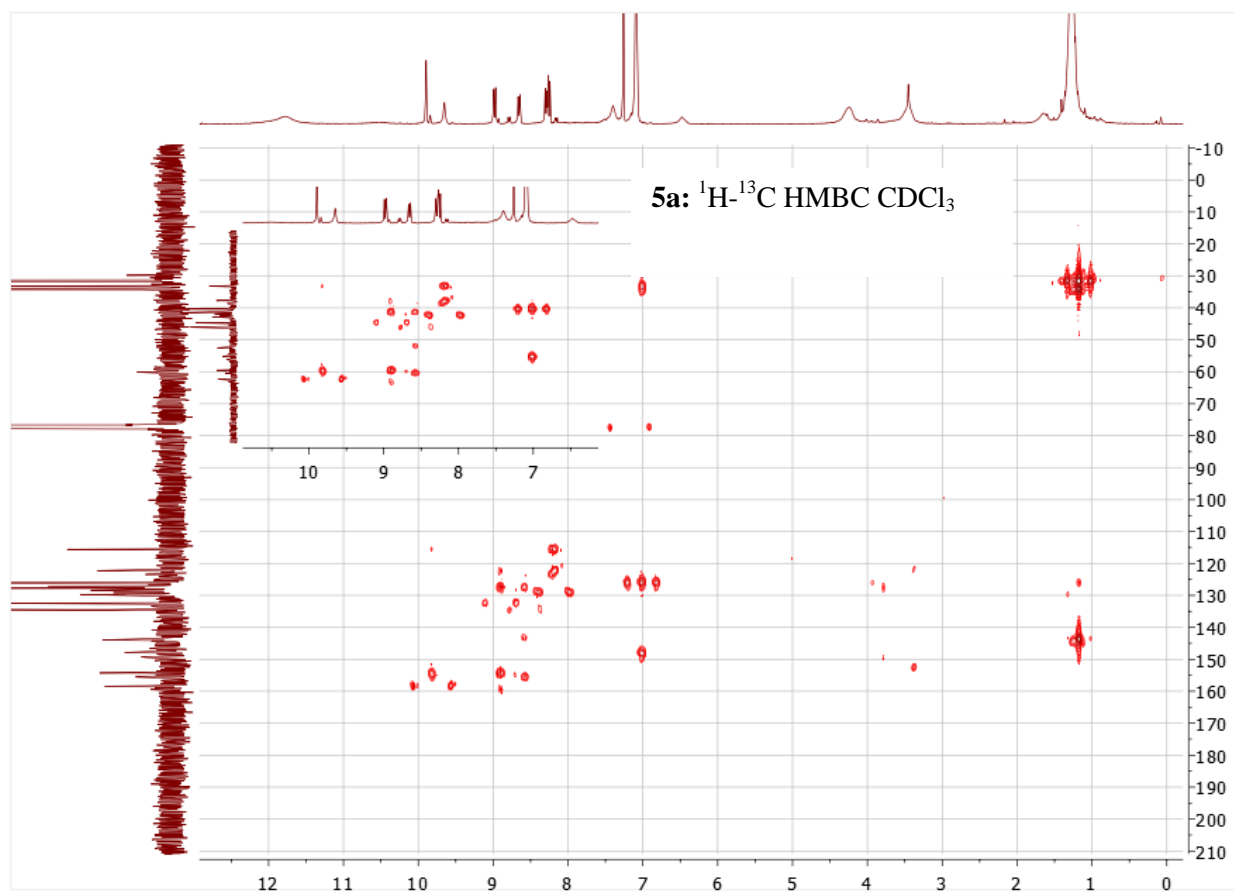

Spectrum S18.  $^1\text{H}$ - $^1\text{H}$  COSY NMR ( $\text{CDCl}_3$ ) of **5a**

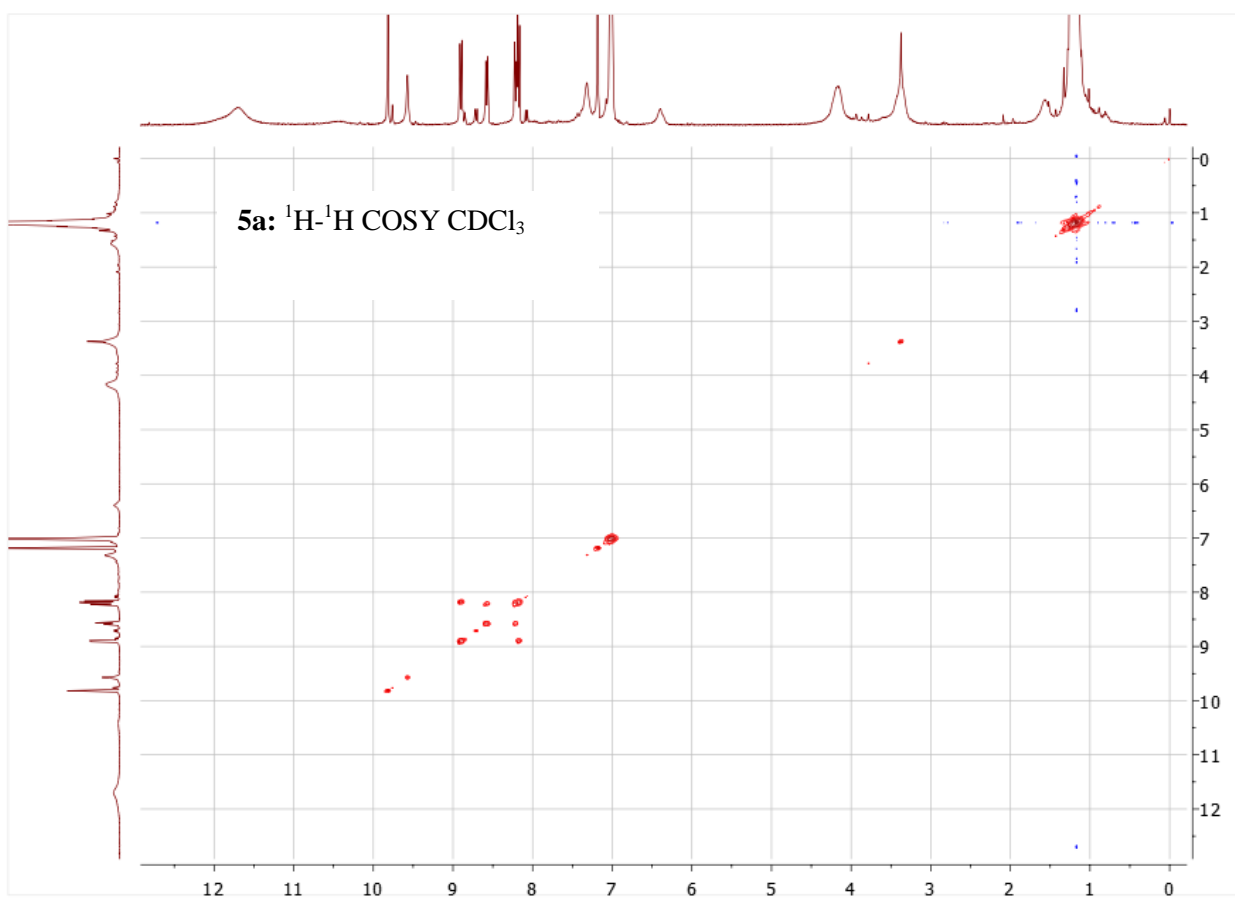

4. Copies of  $^1\text{H}$ ,  $^{13}\text{C}$  NMR spectra for 2-(1,3,7-triazapyrene-6-yl)-25,26,27,28-tetrahydrocalix[4]arene (**5b**)

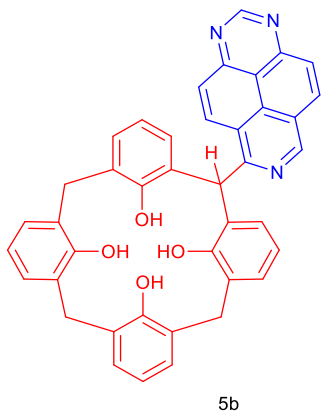

Spectrum S19.  $^1\text{H}$  NMR (400 MHz,  $\text{CDCl}_3$ ) of **5b**

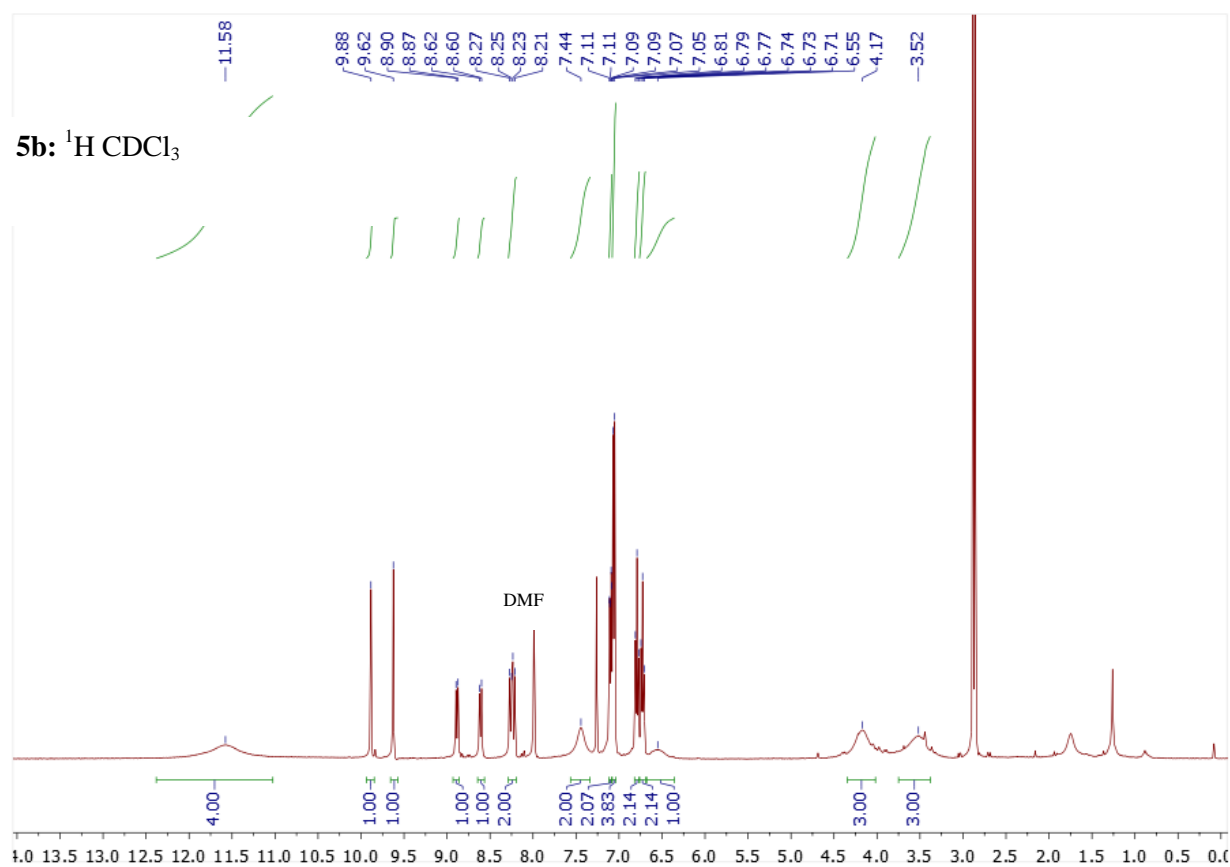

Spectrum S20.  $^{13}\text{C}$   $\{^1\text{H}\}$  NMR (100 MHz,  $\text{CDCl}_3$ ) of **5b**

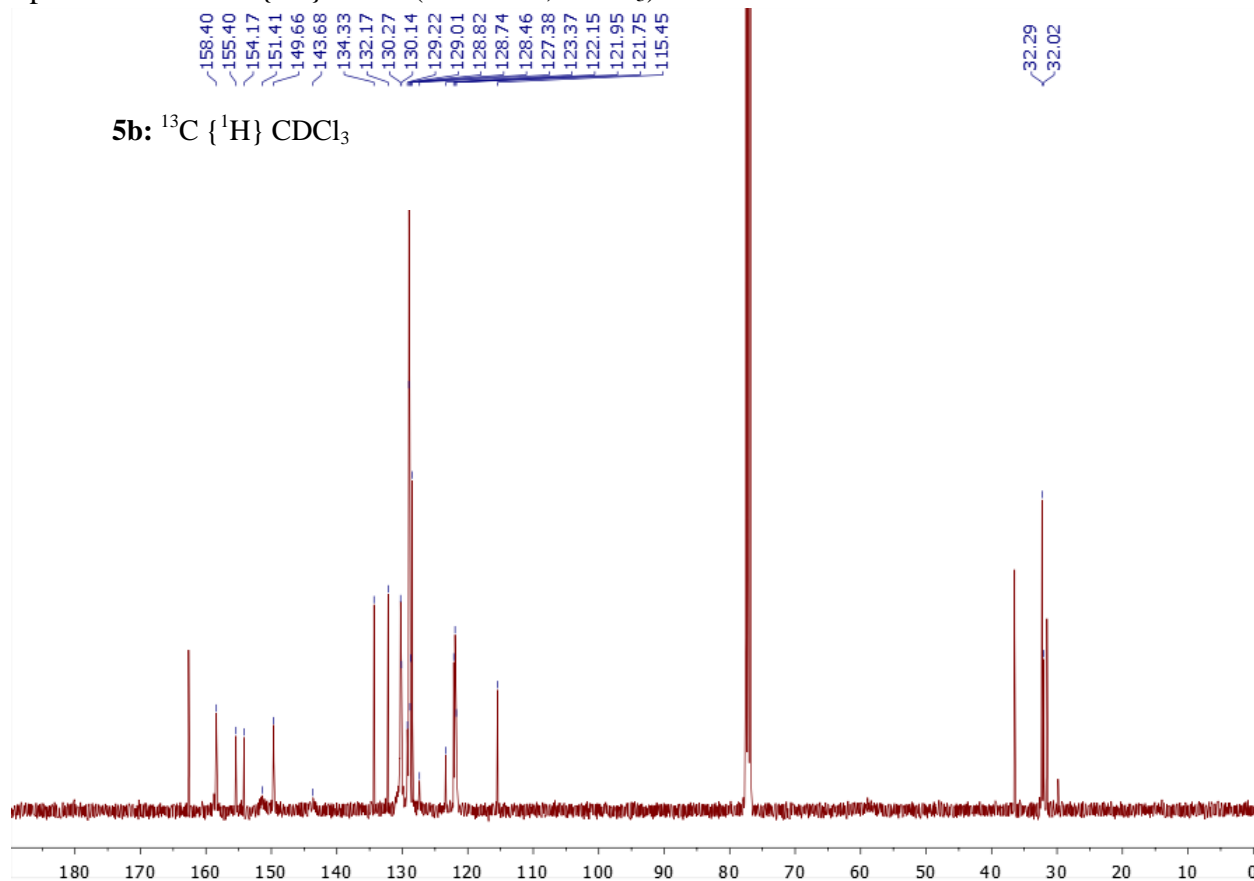

Spectrum S21.  $^1\text{H}$ - $^{13}\text{C}$  HSQC NMR ( $\text{CDCl}_3$ ) of **5b**

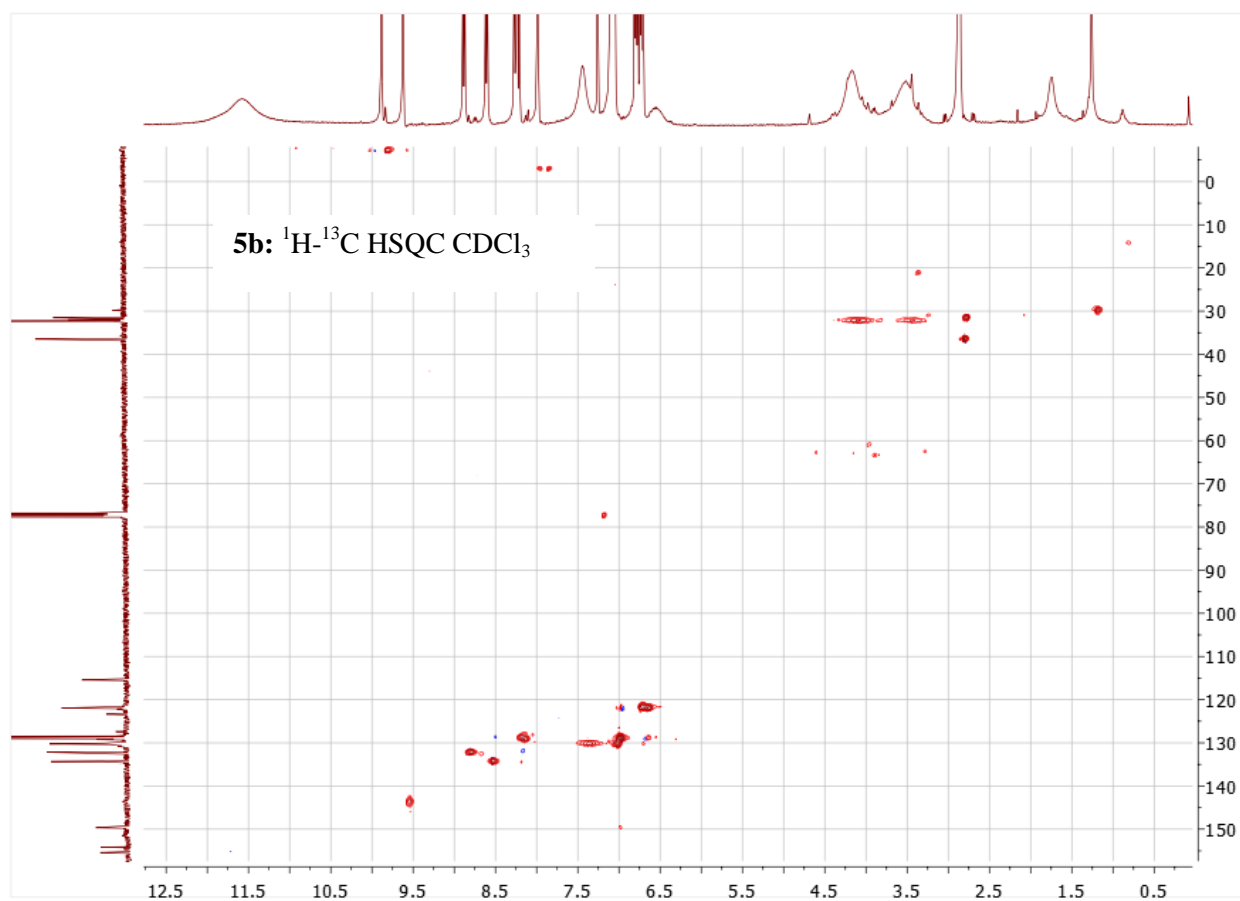

Spectrum S22.  $^1\text{H}$ - $^{13}\text{C}$  HMBC NMR ( $\text{CDCl}_3$ ) of **5b**

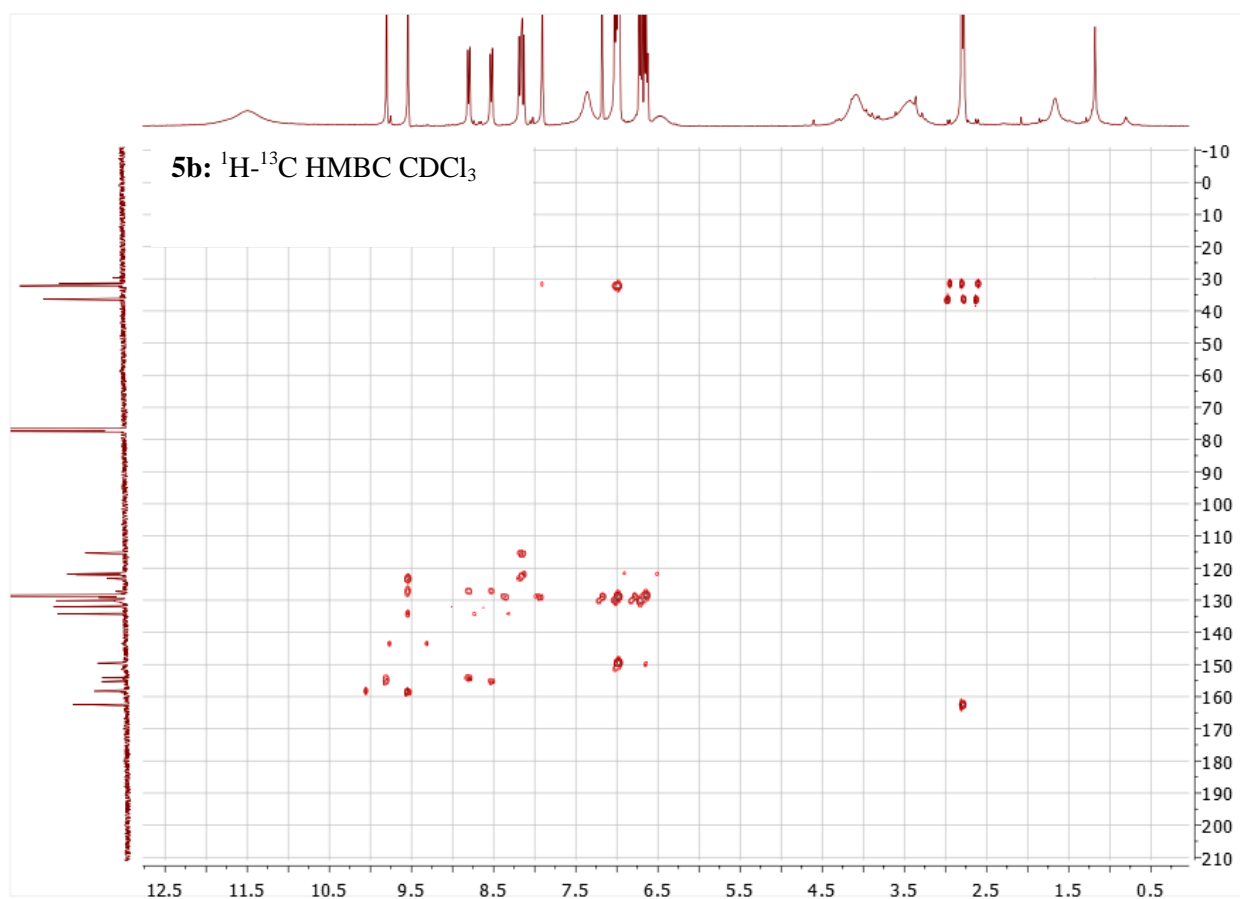

Spectrum S23.  $^1\text{H}$ - $^1\text{H}$  COSY NMR ( $\text{CDCl}_3$ ) of **5b**

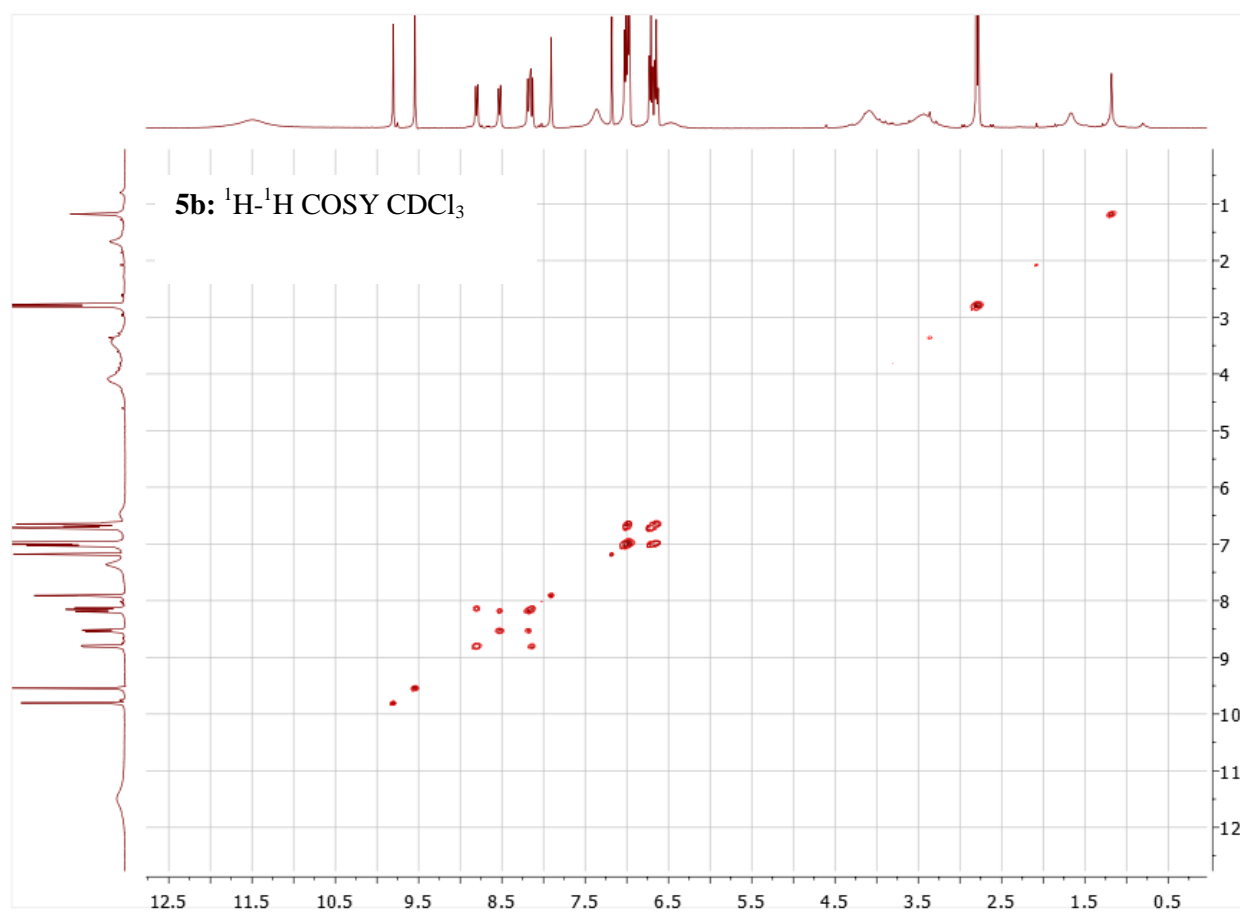

Spectrum S24.  $^1\text{H}$  NMR (400 MHz,  $\text{DMSO-d}_6$ ) of **5b**

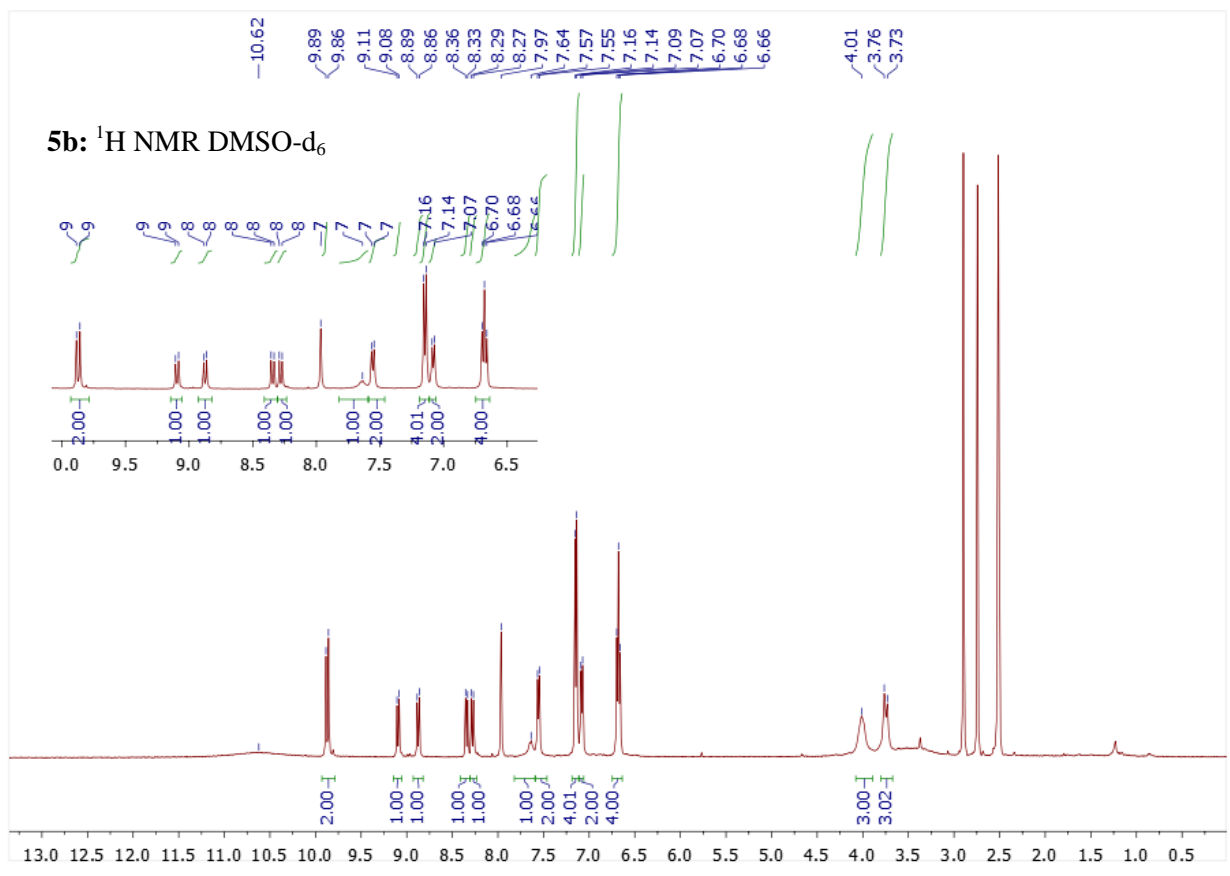

Spectrum S25.  $^1\text{H}$  NMR (400 MHz,  $\text{DMSO-d}_6$ ) of **5b** with addition of  $\text{AlCl}_3$  (10 equiv) in  $\text{D}_2\text{O}$

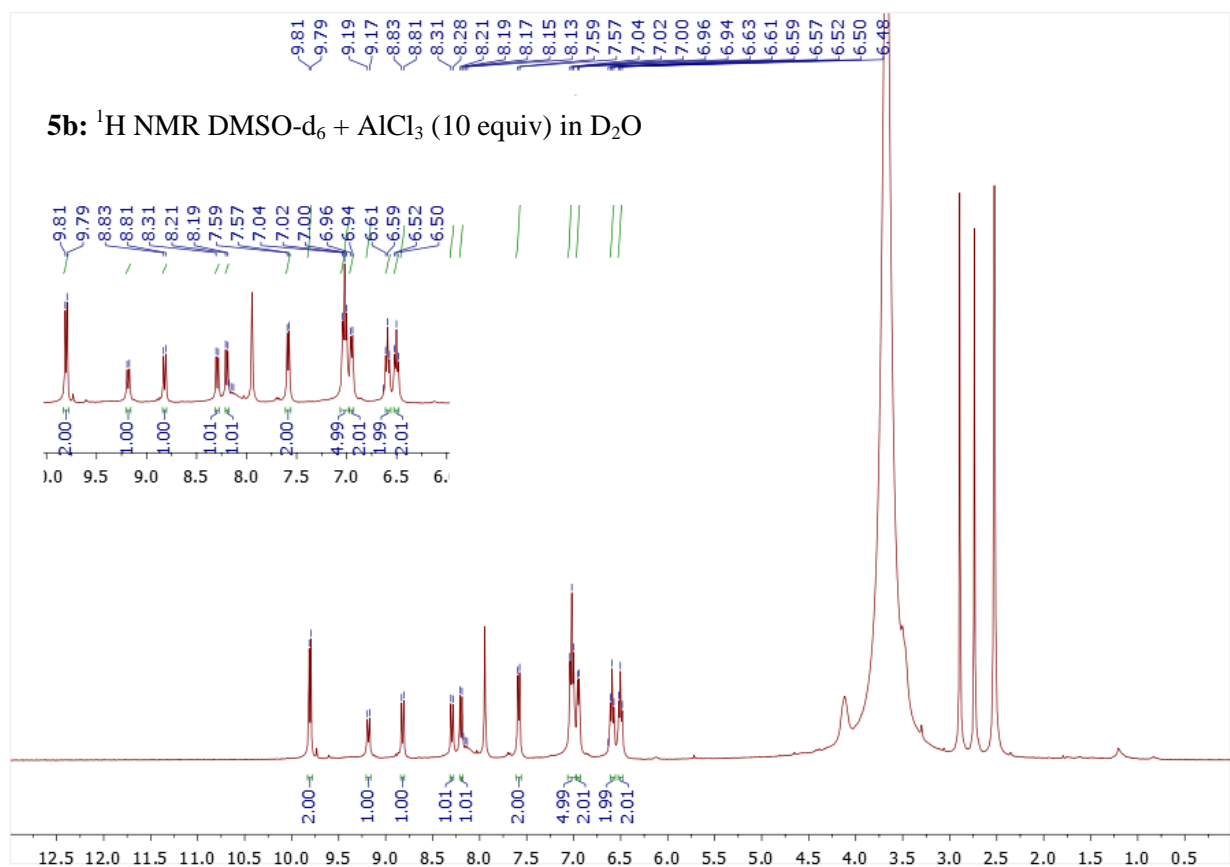

Spectrum S26.  $^1\text{H}$ - $^1\text{H}$  COSY NMR ( $\text{DMSO-d}_6$ ) of **5b** with addition of  $\text{AlCl}_3$  (10 equiv) in  $\text{D}_2\text{O}$



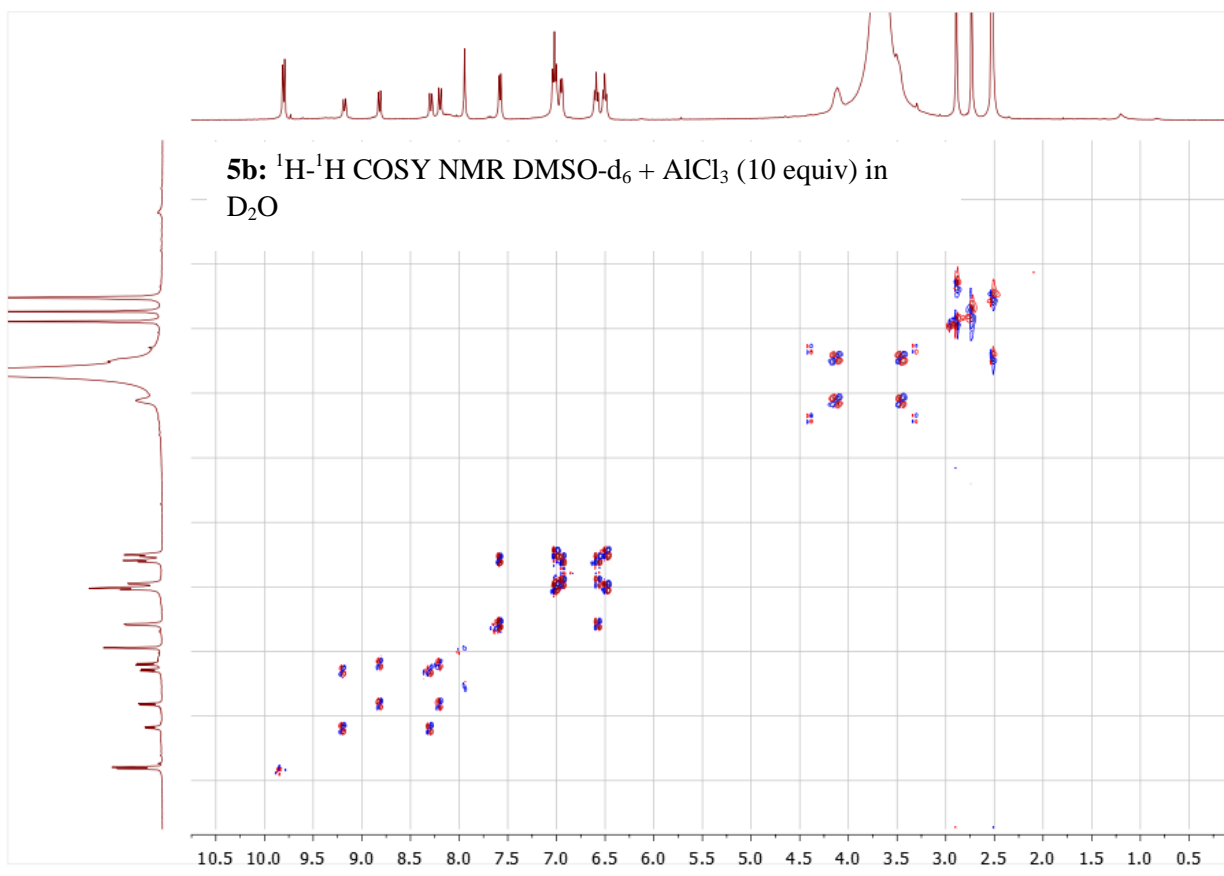

Spectrum S27.  $^1\text{H}$ - $^1\text{H}$  NOESY NMR (DMSO- $d_6$ ) of **5b** with addition of  $\text{AlCl}_3$  (10 equiv) in  $\text{D}_2\text{O}$

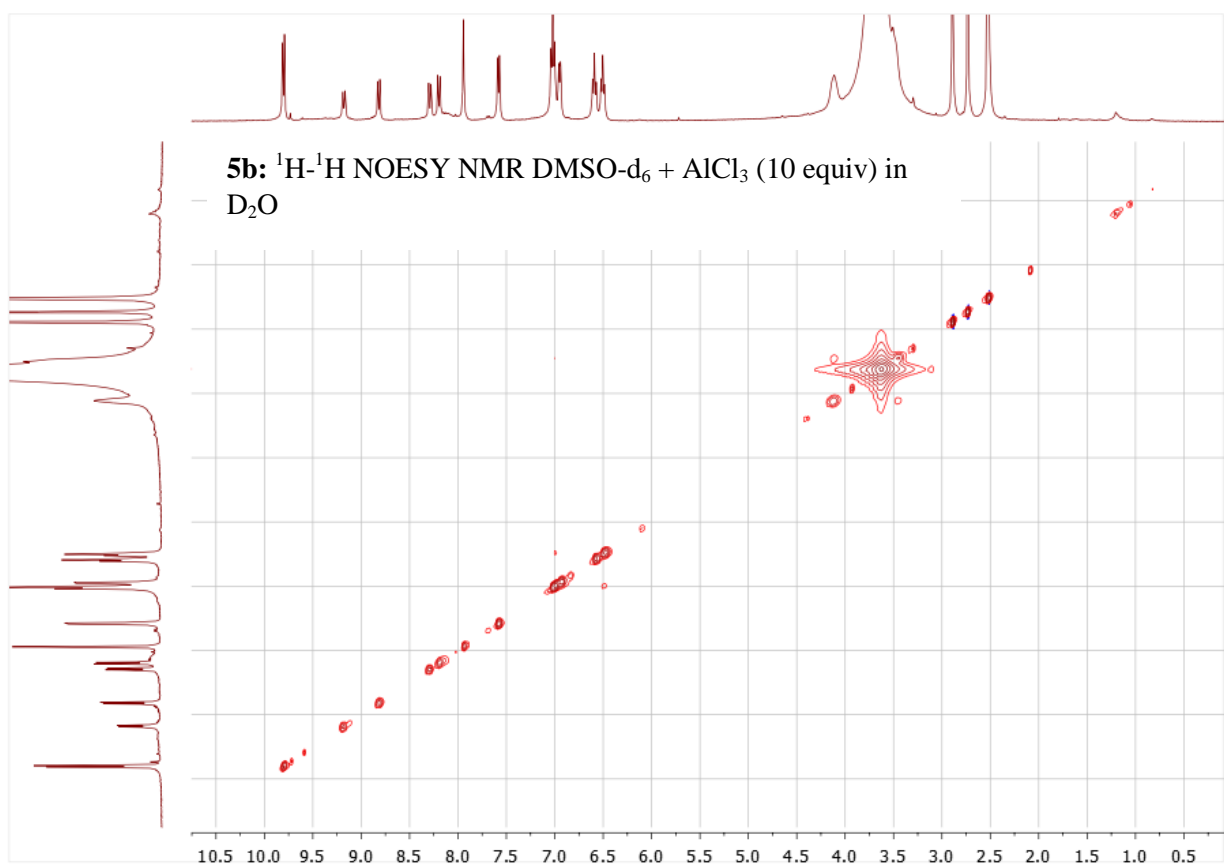

Spectrum S28.  $^{13}\text{C}\{^1\text{H}\}$  NMR (100 MHz, DMSO-d<sub>6</sub>) of **5b** with addition of  $\text{AlCl}_3$  (10 equiv) in  $\text{D}_2\text{O}$

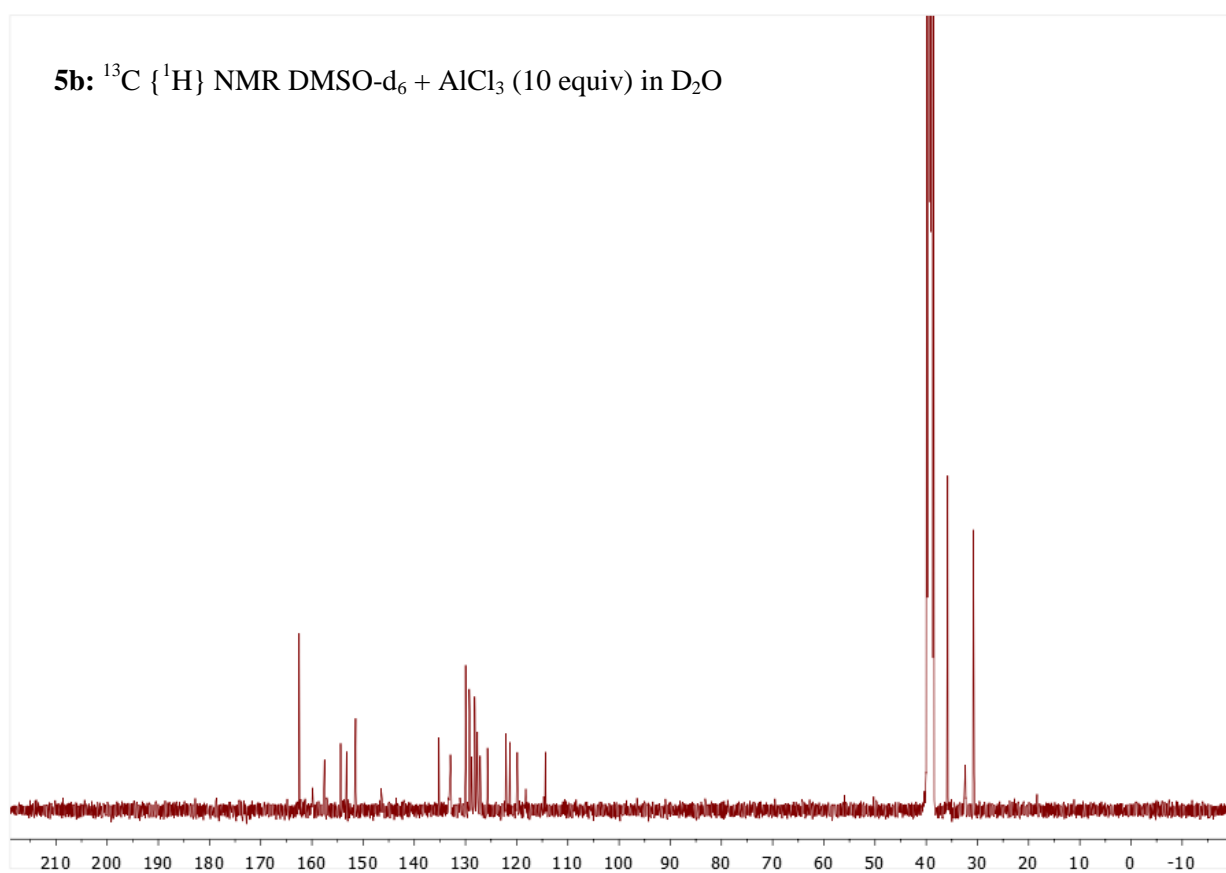

Spectrum S29.  $^1\text{H}\text{-}^{13}\text{C}$  HSQC NMR (DMSO-d<sub>6</sub>) of **5b** with addition of  $\text{AlCl}_3$  (10 equiv) in  $\text{D}_2\text{O}$

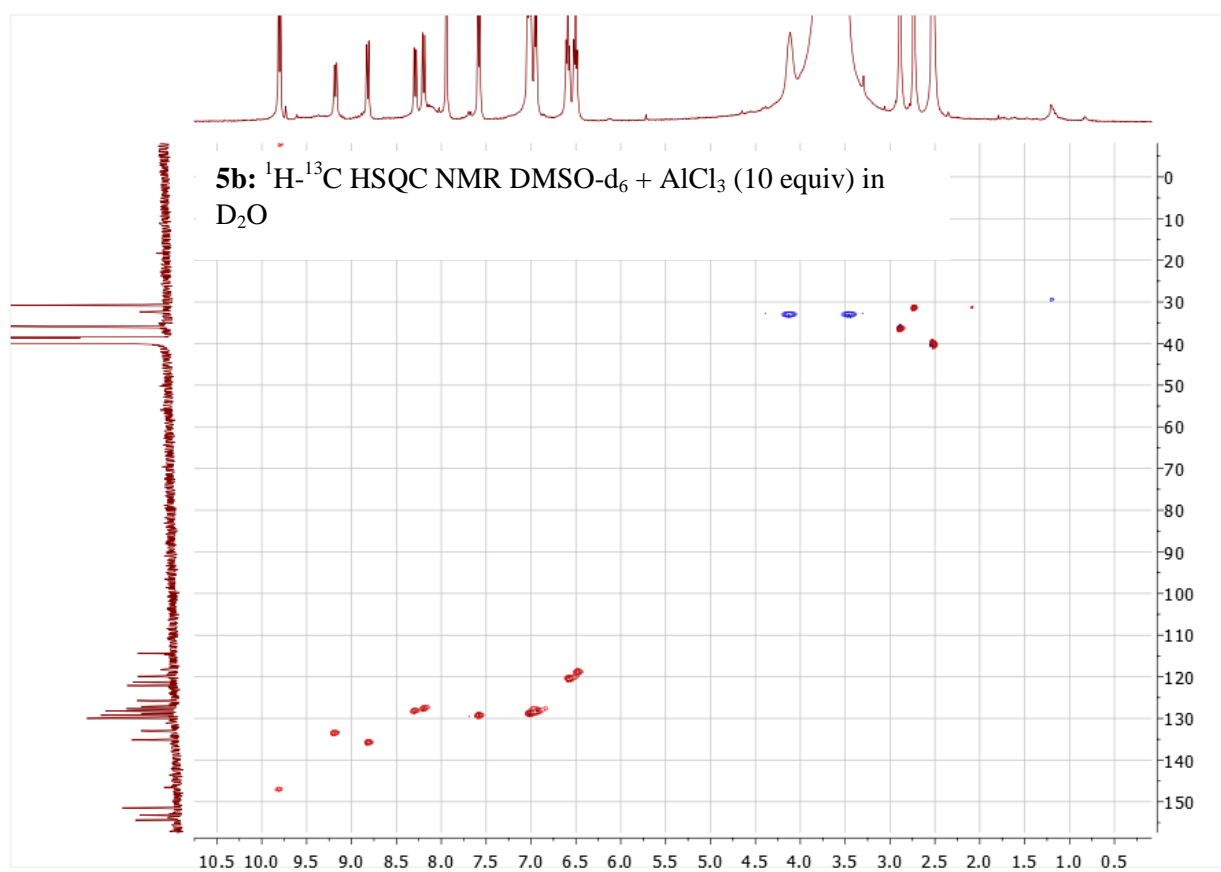

Spectrum S30.  $^1\text{H}$ - $^{13}\text{C}$  HMBC NMR (DMSO- $d_6$ ) of **5b** with addition of  $\text{AlCl}_3$  (10 equiv) in  $\text{D}_2\text{O}$

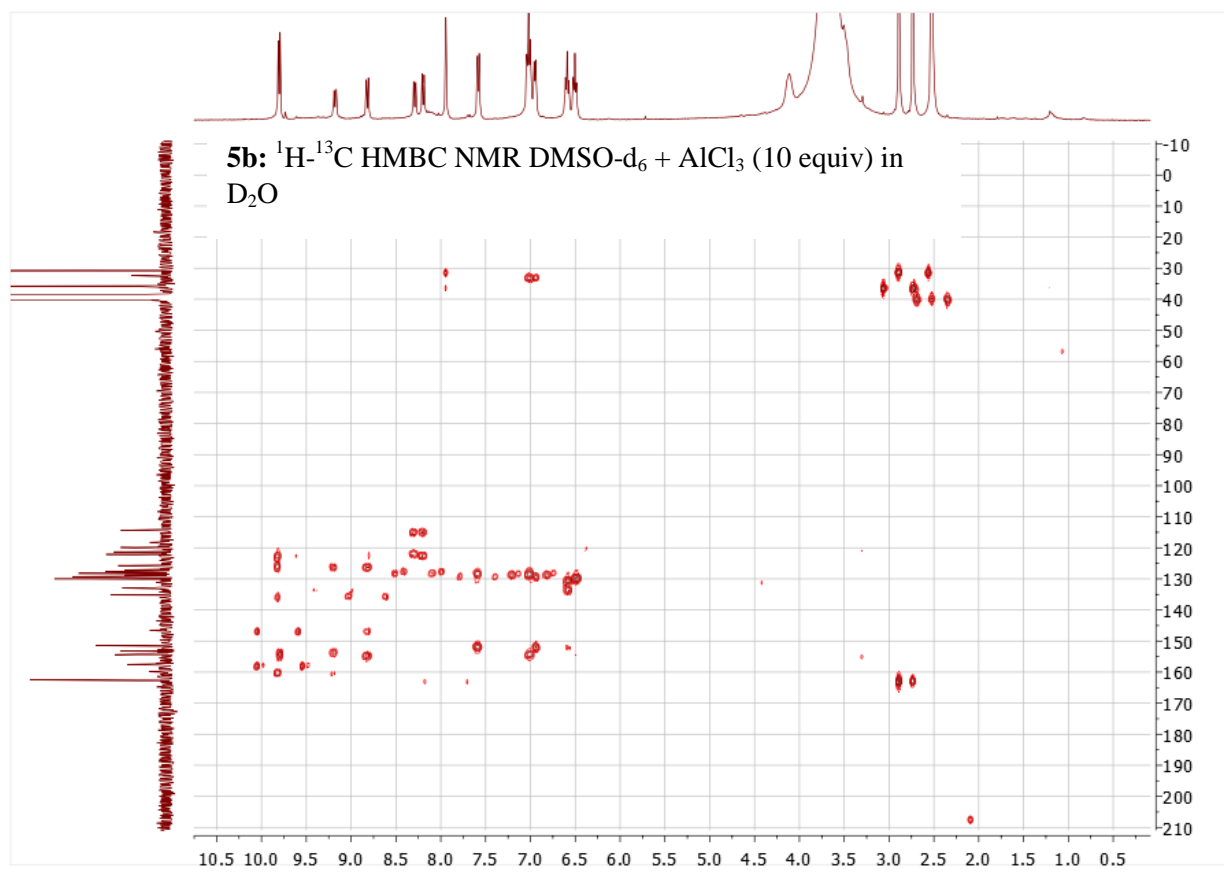

In order to clarify the reasons of changes in the NMR spectra (complex formation or conformational transformation), the control  $^1\text{H}$  NMR experiment without  $\text{Al}^{3+}$  ions in the DMSO- $d_6$ / $\text{D}_2\text{O}$  mixture was carried out

Spectrum S31.  $^1\text{H}$  NMR (DMSO- $d_6$ / $\text{D}_2\text{O}$  mixture) of **5b**

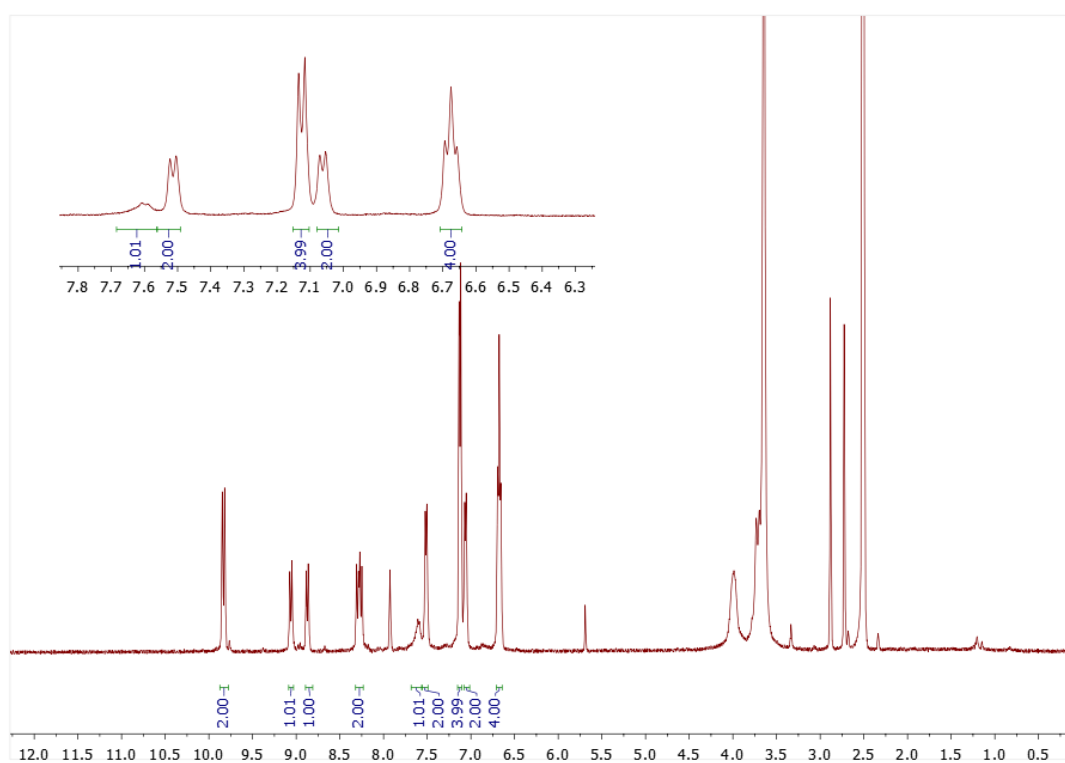

## 5. Photophysical studies

### 5.1. Absorbance spectra

Spectrum S32. Absorbance of **4a** ( $C = 10^{-5}$  M in THF)

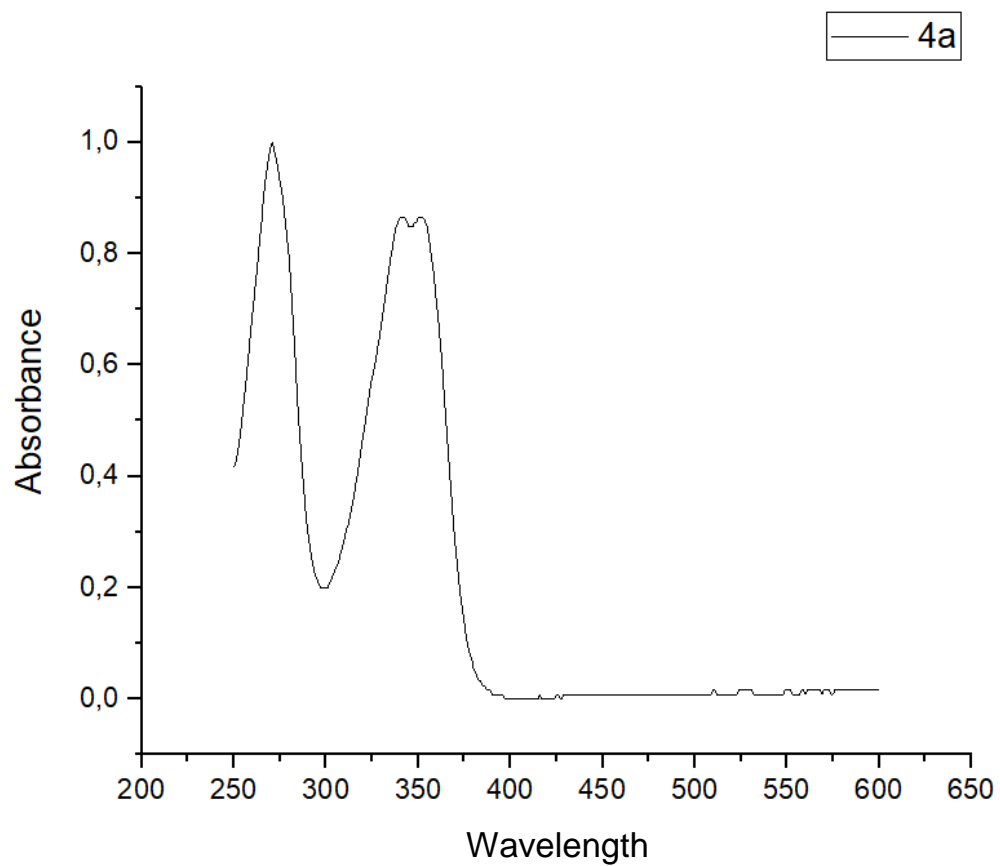

Spectrum S33. Absorbance of **4b** ( $C = 10^{-5}$  M in THF)

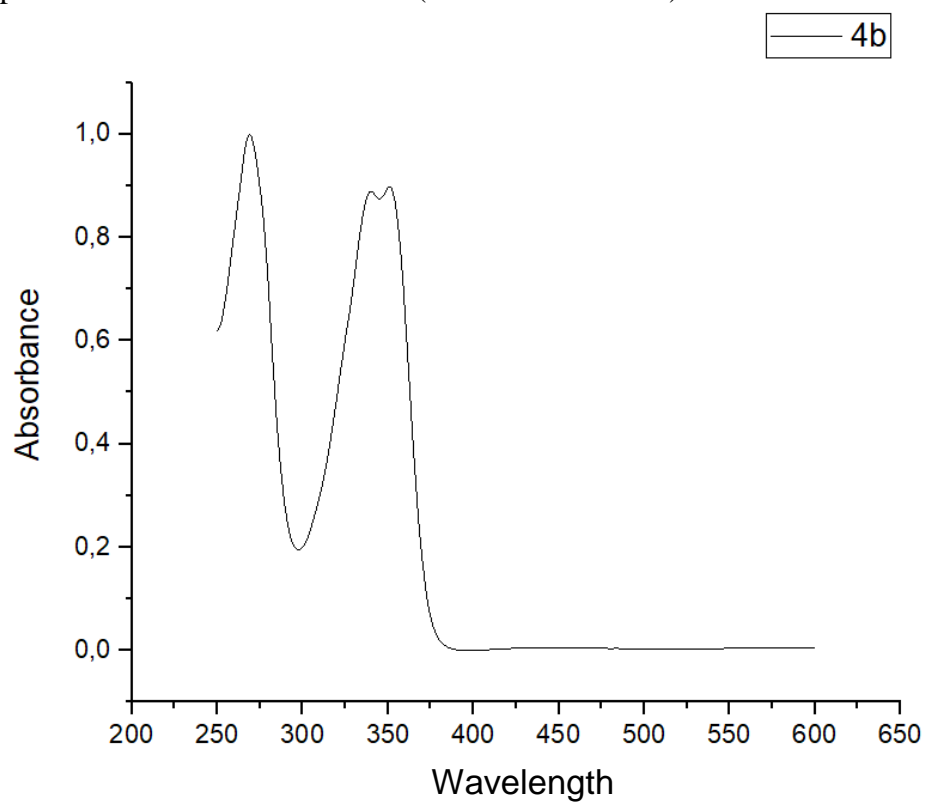

Spectrum S34. Absorbance of **5a** ( $C = 10^{-5}$  M in THF)

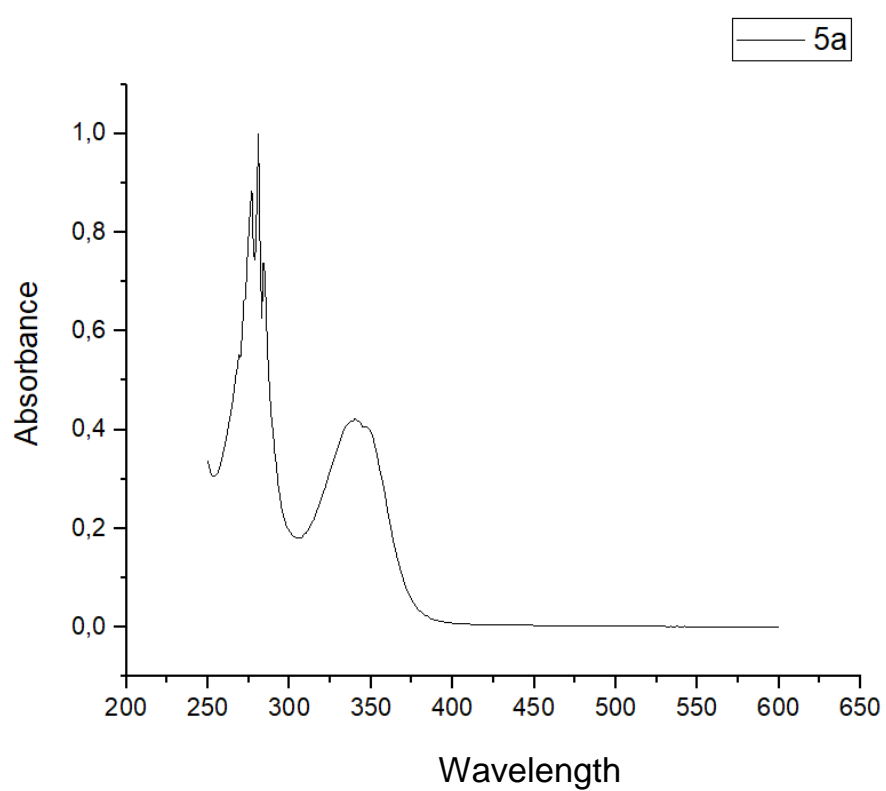

Spectrum S35. Absorbance of **5b** ( $C = 10^{-5}$  M in THF)

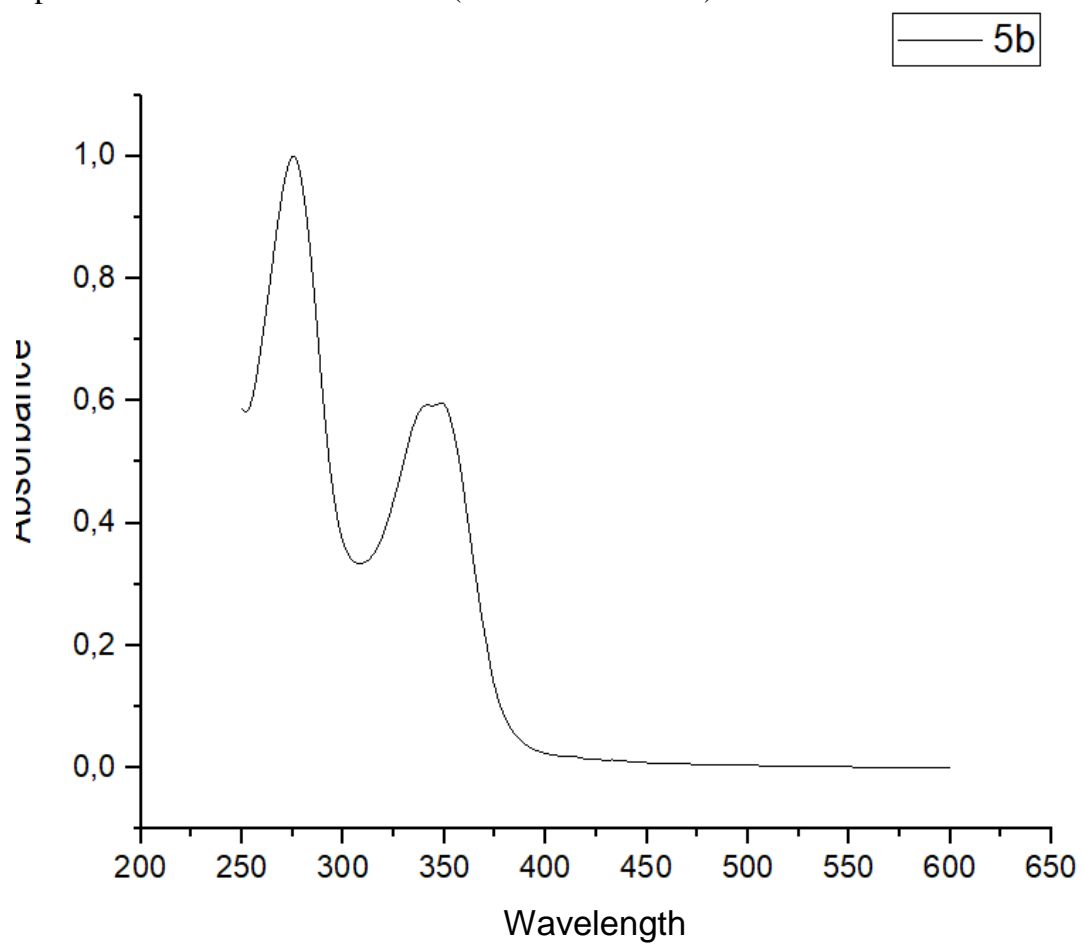

## 5.2. Emission spectra

Spectrum S36. Emission of **4a** ( $C = 10^{-5}$  M in THF)  $\lambda_{\text{ex}} = 352$  nm

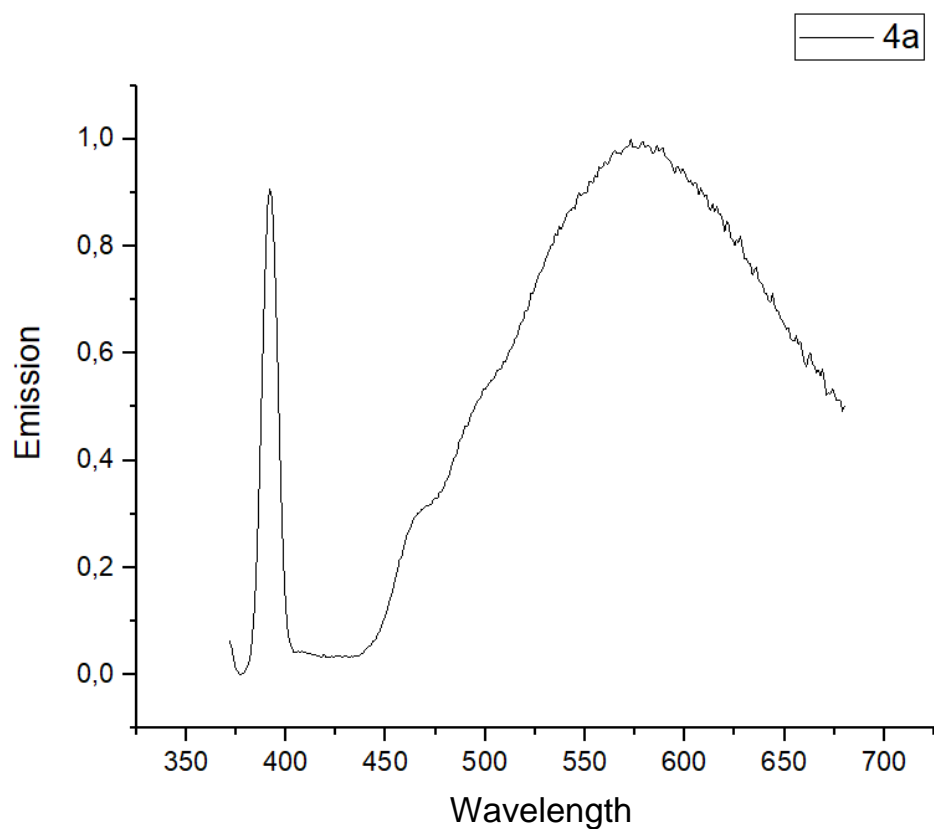

Spectrum S37. Emission of **4b** ( $C = 10^{-5}$  M in THF)  $\lambda_{\text{ex}} = 351$  nm

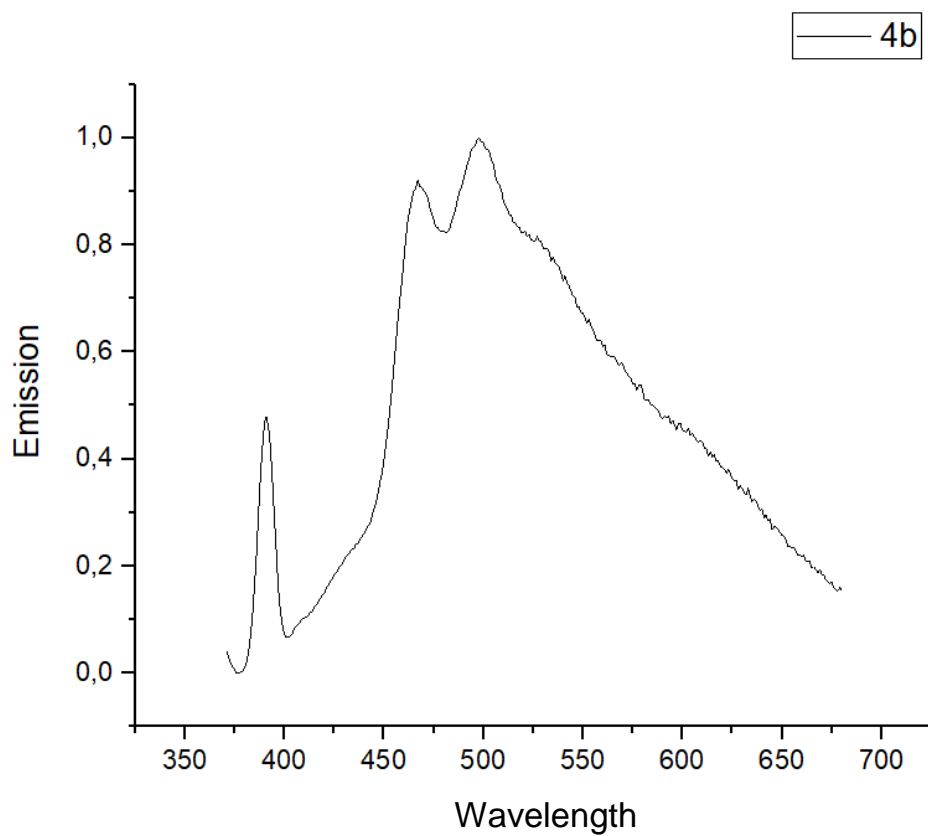

Spectrum S38. Emission of **5a** ( $C = 10^{-5}$  M in THF)  $\lambda_{\text{ex}} = 341$  nm

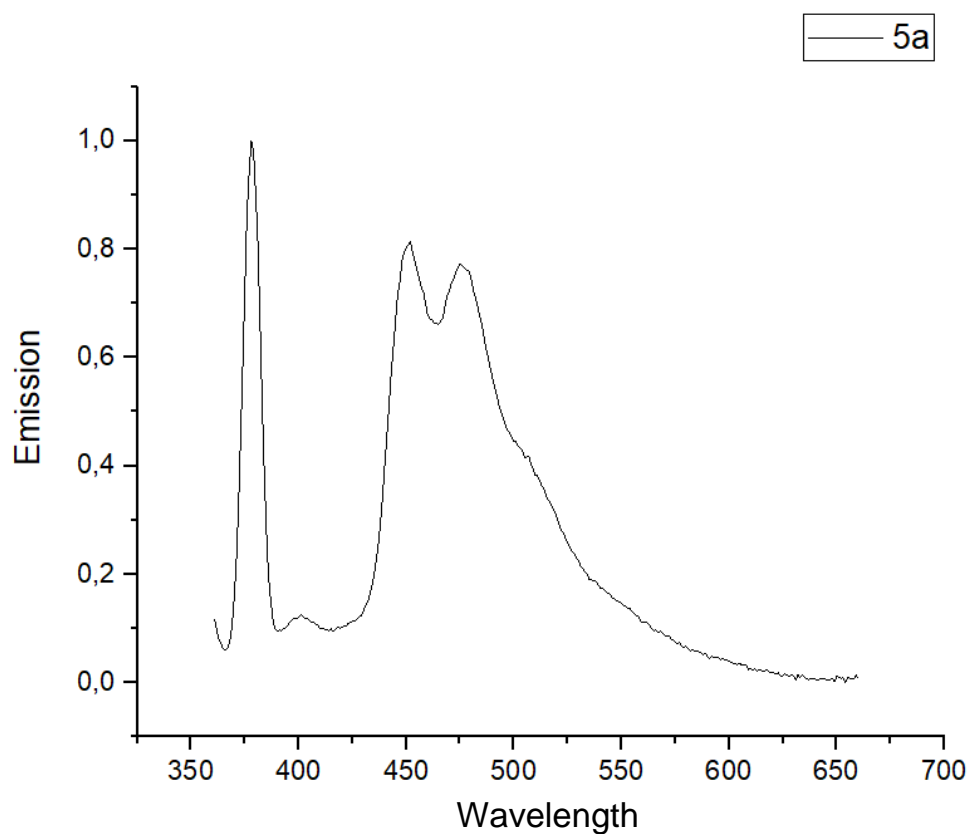

Spectrum S39. Emission of **5b** ( $C = 10^{-5}$  M in THF)  $\lambda_{\text{ex}} = 350$  nm

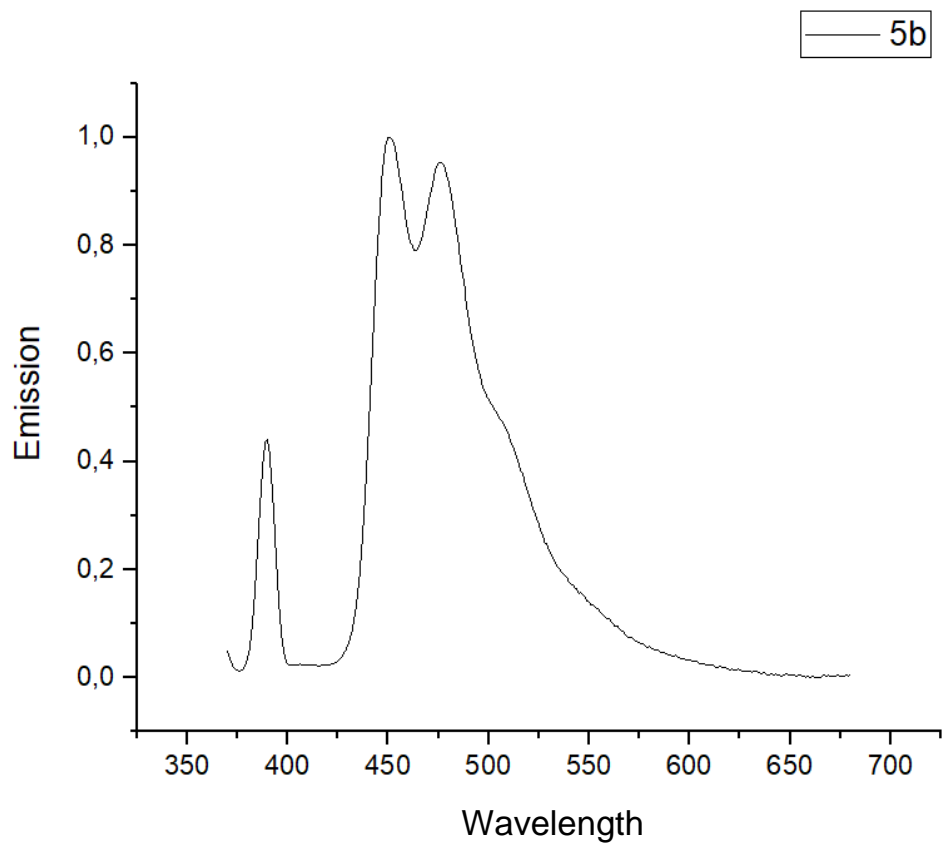



### 5.3. Emission spectra in the presence of various metal ions

Spectrum S40. Emission of **4a** ( $C = 10^{-5}$  M in THF) with the presence of various metal ions (10 equiv in  $H_2O$ )  $\lambda_{ex} = 352$  nm

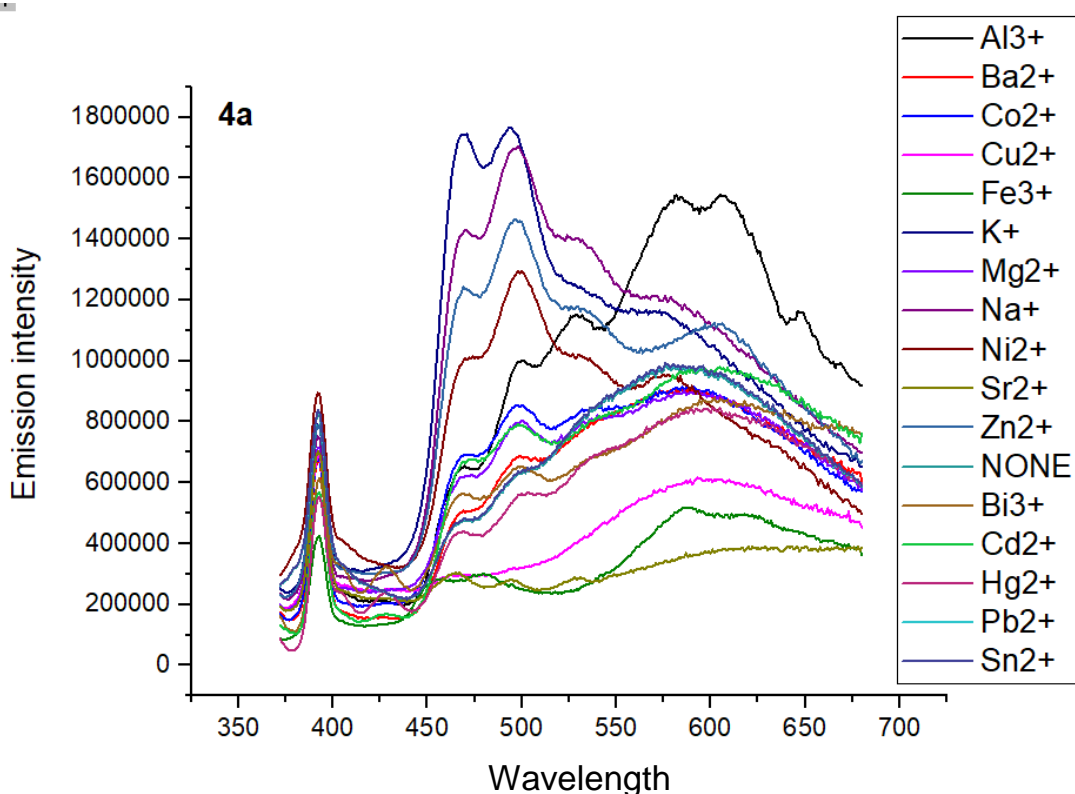

Spectrum S41. Emission of **4b** ( $C = 10^{-5}$  M in THF) with the presence of various metal ions (10 equiv in  $H_2O$ )  $\lambda_{ex} = 351$  nm

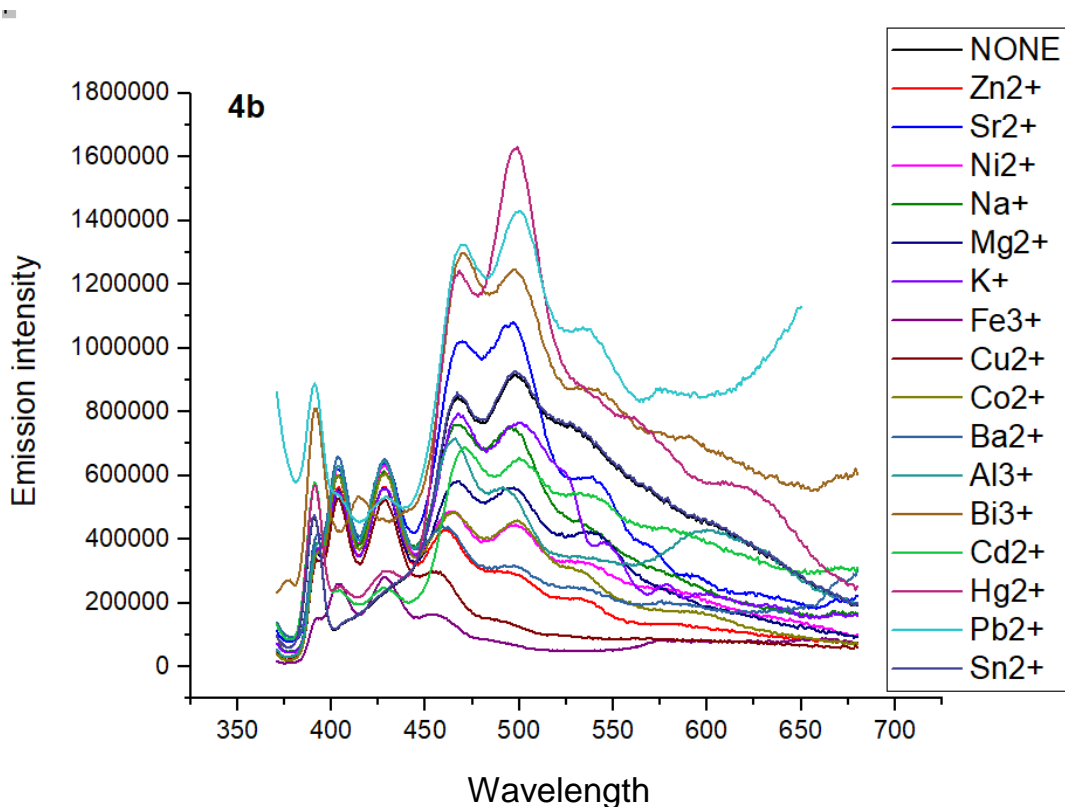

Spectrum S42. Emission of **5a** ( $C = 10^{-5}$  M in THF) with the presence of various metal ions (10 equiv in  $H_2O$ )  $\lambda_{ex} = 341$  nm

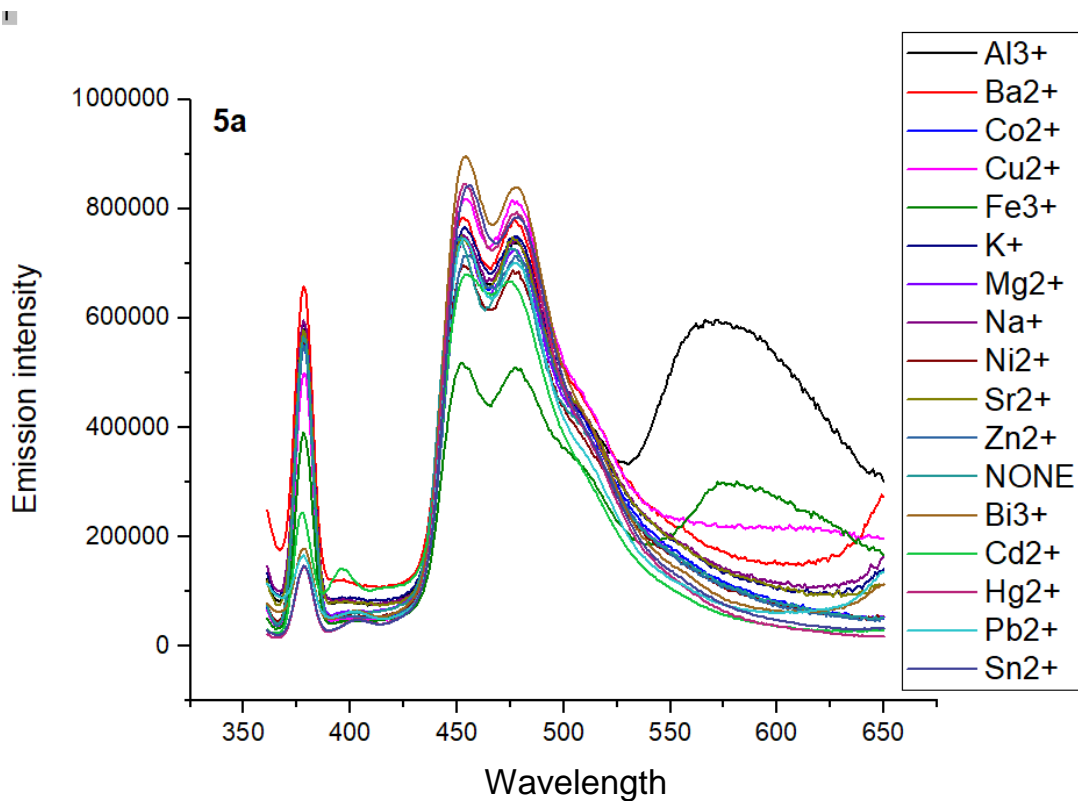

Spectrum S43. Emission of **5b** ( $C = 10^{-5}$  M in THF) with the presence of various metal ions (10 equiv in  $H_2O$ )  $\lambda_{ex} = 350$  nm

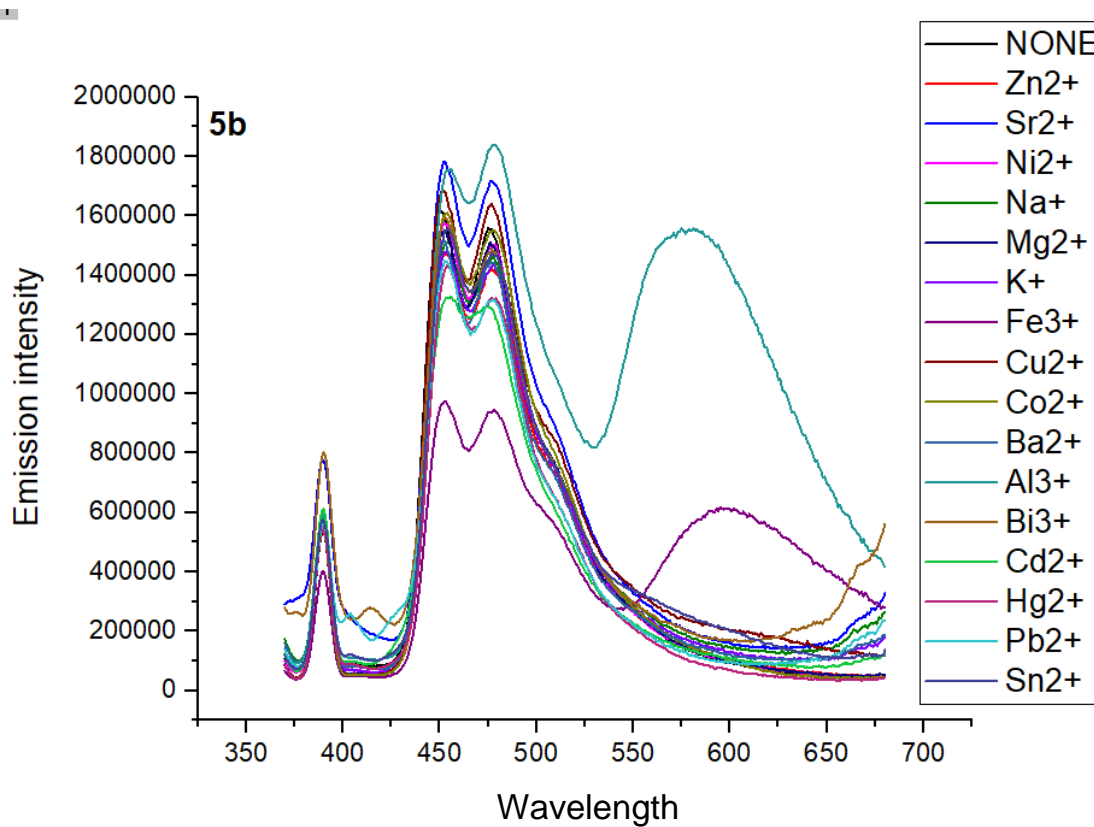

## 6. Determining the stoichiometry of ligand: metal complex

The Job's method<sup>1</sup> was applied to determine the stoichiometry of **5b**:Al<sup>3+</sup> and **5b**:Fe<sup>3+</sup> complexes.

Figure S1. Job's plot for stoichiometry determination of **5b**:Al<sup>3+</sup> complex,  $\lambda_{\text{ex}} = 350 \text{ nm}$ ,  $\lambda_{\text{em}} = 570 \text{ nm}$ .

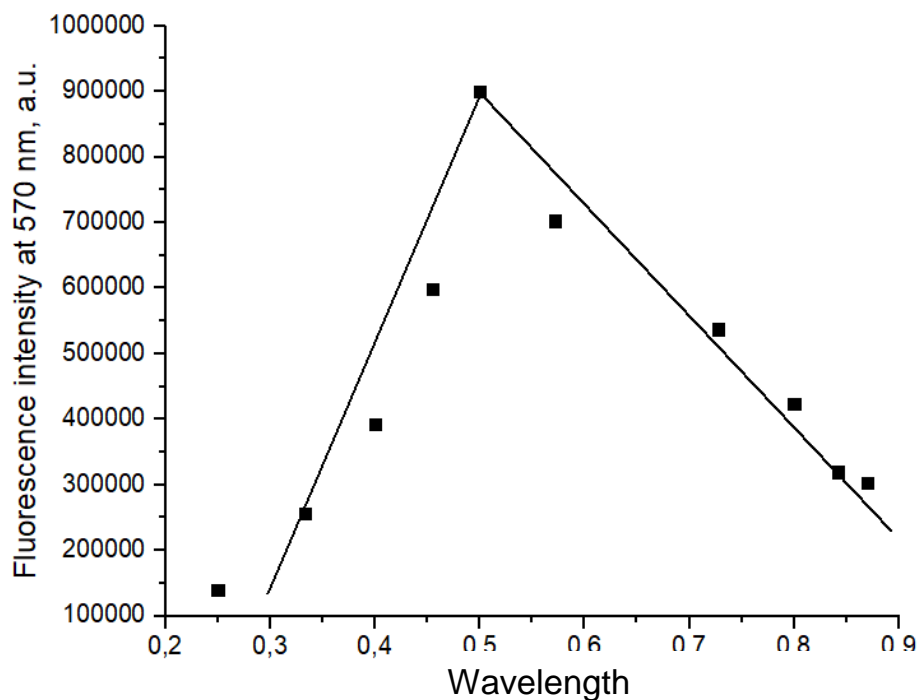

Figure S2. Job's plot for determination stoichiometry of **5b**:Fe<sup>3+</sup> complex,  $\lambda_{\text{ex}} = 350 \text{ nm}$ ,  $\lambda_{\text{em}} = 570 \text{ nm}$ .

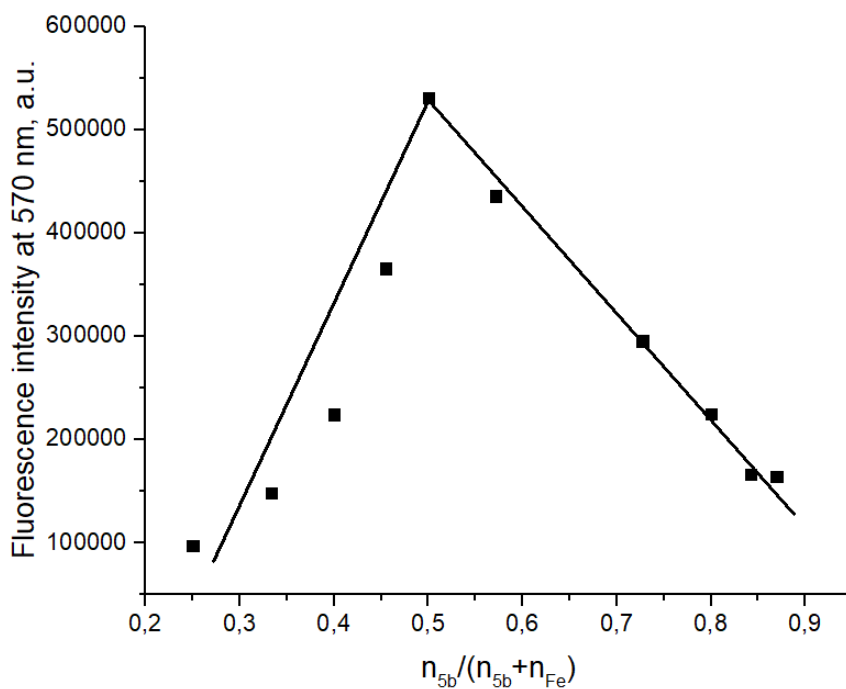

## 7. Binding constants measurement

Figure S3. Plot of emission intensity of **5b** with increasing concentration of  $\text{Al}^{3+}$  in THF,  $\lambda_{\text{ex}} = 350$  nm,  $\lambda_{\text{em}} = 570$  nm

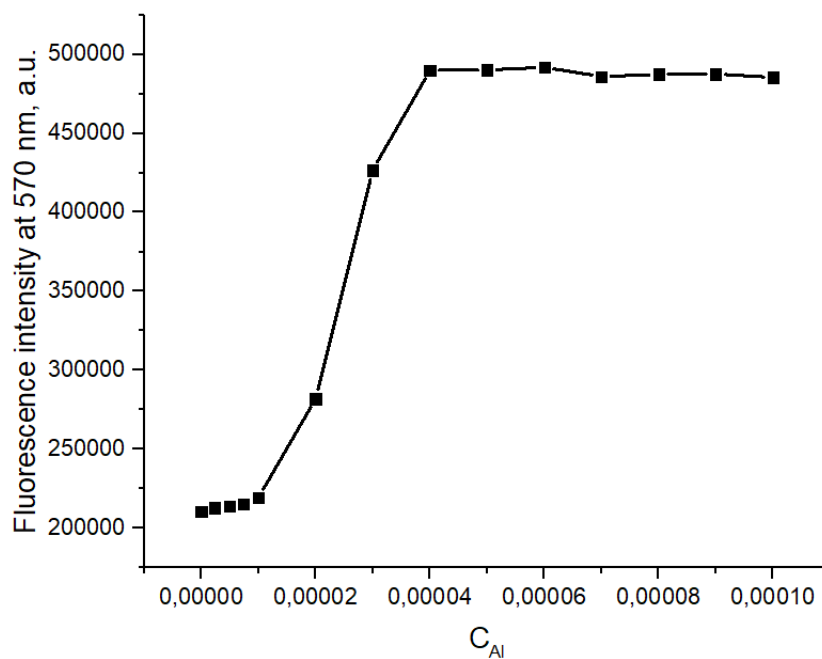

Figure S4. Plot of emission intensity of **5b** with increasing concentration of  $\text{Fe}^{3+}$  in THF,  $\lambda_{\text{ex}} = 350$  nm,  $\lambda_{\text{em}} = 570$  nm

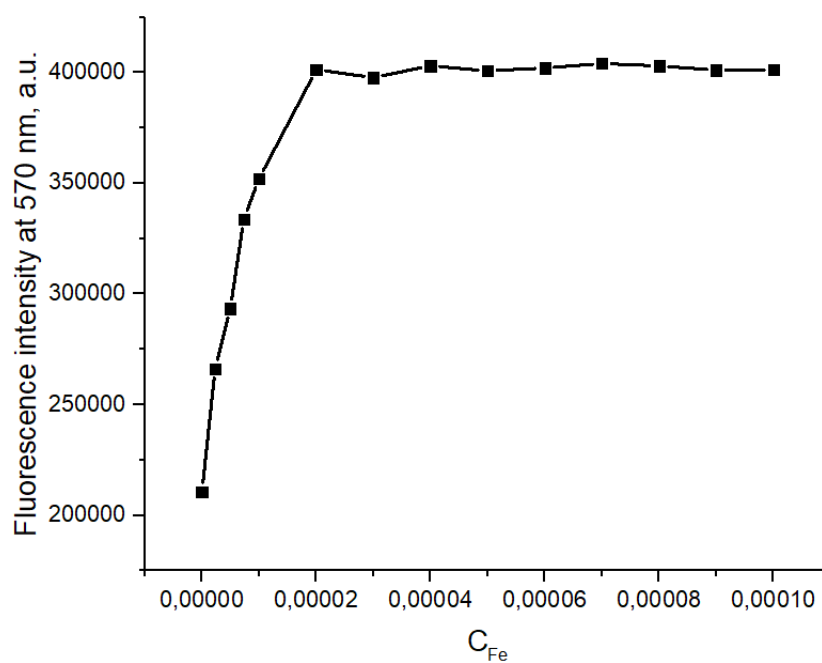

Binding interactions of **5b** with Al<sup>3+</sup> and Fe<sup>3+</sup> cations in THF with addition of various concentration of guests in H<sub>2</sub>O have been estimated using the modified Benesi–Hildebrand equation.<sup>2</sup>

$(F_{\max} - F_0) / (F_x - F_0) = 1 + (1/K) (1/[M]^n)$ , where F<sub>0</sub>, F<sub>x</sub> and F<sub>max</sub> are the emission intensities of **5b** in the absence of Al<sup>3+</sup> or Fe<sup>3+</sup>, at an intermediate Al<sup>3+</sup> and Fe<sup>3+</sup>, and at a concentration of complete interaction, respectively, where K is the binding constant, M is the concentration of Al<sup>3+</sup> or Fe<sup>3+</sup> and n is the number of Al<sup>3+</sup> or Fe<sup>3+</sup> ions bound per **5b** (here, n = 1).

Emission intensities of **5b** (10 μM) in presence of different Al<sup>3+</sup> or Fe<sup>3+</sup> concentrations, namely 2.33, 5, 7.33, 10, 30, 50, 70, 90 μM have been used for calculation of binding constant.

The equation (example for Al<sup>3+</sup>) used is:

$(F_{\max} - F_0) / (F_x - F_0) = 1 + (1/K[M]^n)$ , where F<sub>max</sub> = 492880 a.u., F<sub>0</sub> = 210512 a.u., n = 1.

When 30 μM Al<sup>3+</sup> is added to **5b** (10 μM), F<sub>x</sub> = 426766 a.u.,

Now,  $(F_{\max}-F_0) / (F_x-F_0) = (492880 - 210512) / (426766- 210512)$  and  $1/ [M] = 1/(30)$

or,  $1.3057 = 1 + 1/ 30K$

Similar calculations were performed to other concentrations.

Thus, plot of  $(F_{\max} - F_0) / (F_x - F_0)$  vs.  $1/ [M]$  based on  $Y = 1+ P \times X$ , yields the slope, P = 439.97 for Al<sup>3+</sup> and 6.13 for Fe<sup>3+</sup>.

So,  $K(\text{Al}^{3+}) = 2.27 \cdot 10^3 \text{ M}^{-1}$ ;  $K(\text{Fe}^{3+}) = 1.63 \cdot 10^5 \text{ M}^{-1}$ .

Figure S5. Benesi–Hildebrand equation for determining the binding constant of **5b** with  $\text{Al}^{3+}$  using the fluorescent titration,  $\lambda_{\text{ex}} = 350 \text{ nm}$ ,  $\lambda_{\text{em}} = 570 \text{ nm}$

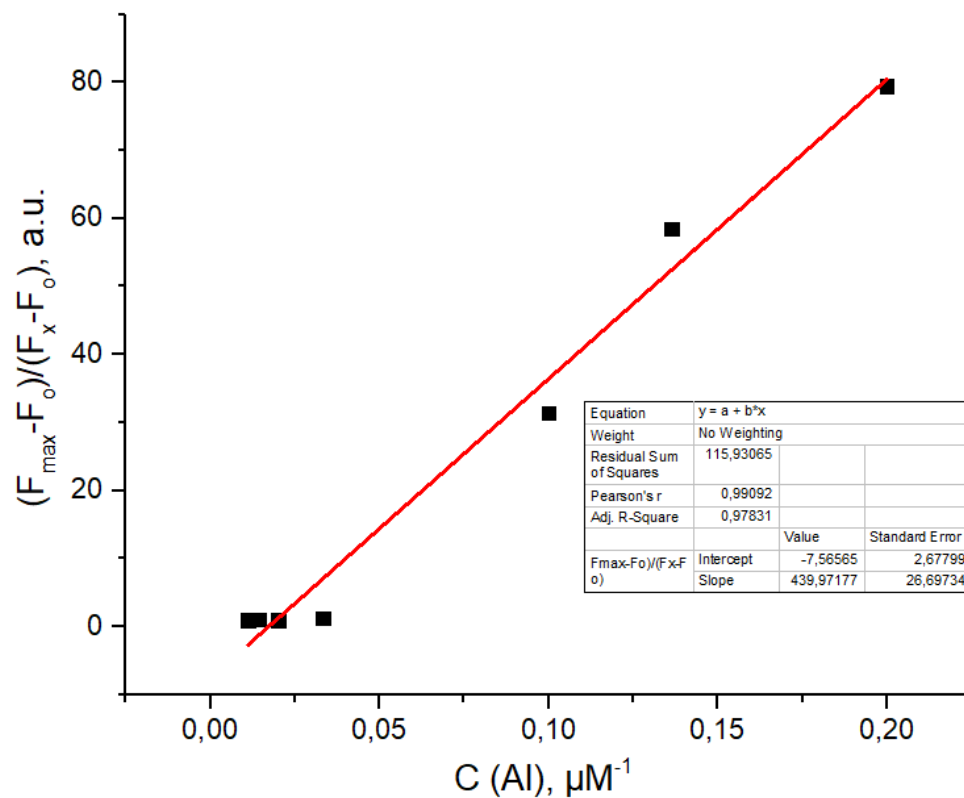

Figure S6. Benesi–Hildebrand equation for determining binding constant of **5b** with  $\text{Fe}^{3+}$  using the fluorescent titration,  $\lambda_{\text{ex}} = 350 \text{ nm}$ ,  $\lambda_{\text{em}} = 570 \text{ nm}$

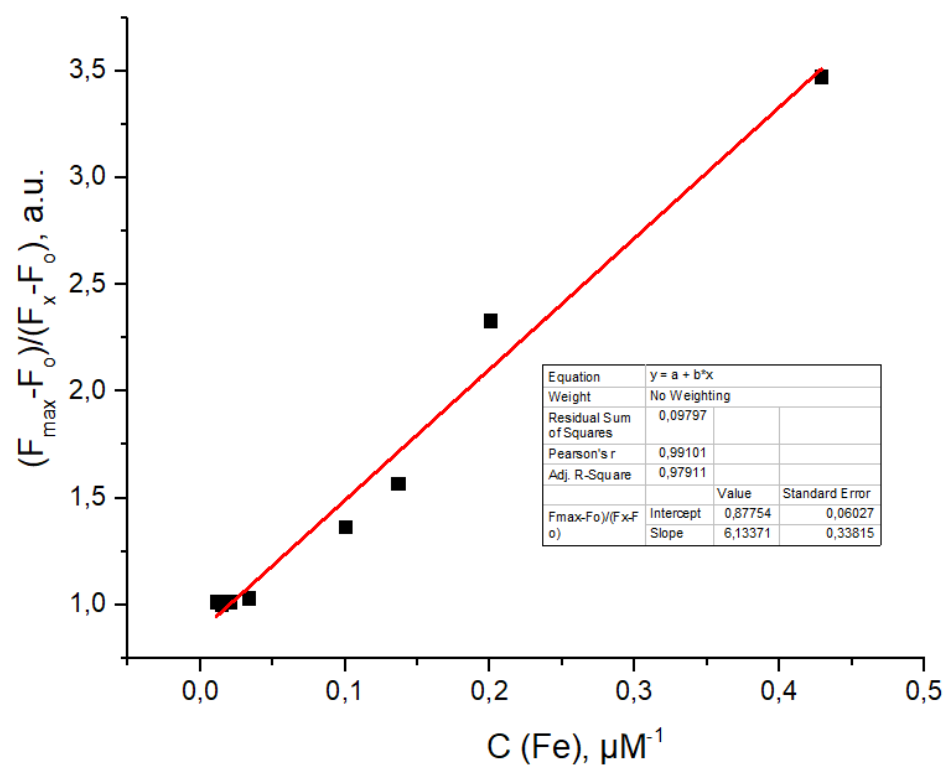

## 8. Emission spectra depending on pH

Spectrum S44. Emission intensity of **5b** in different pH,  $\lambda_{\text{ex}} = 350 \text{ nm}$ ,  $\lambda_{\text{em}} = 570 \text{ nm}$

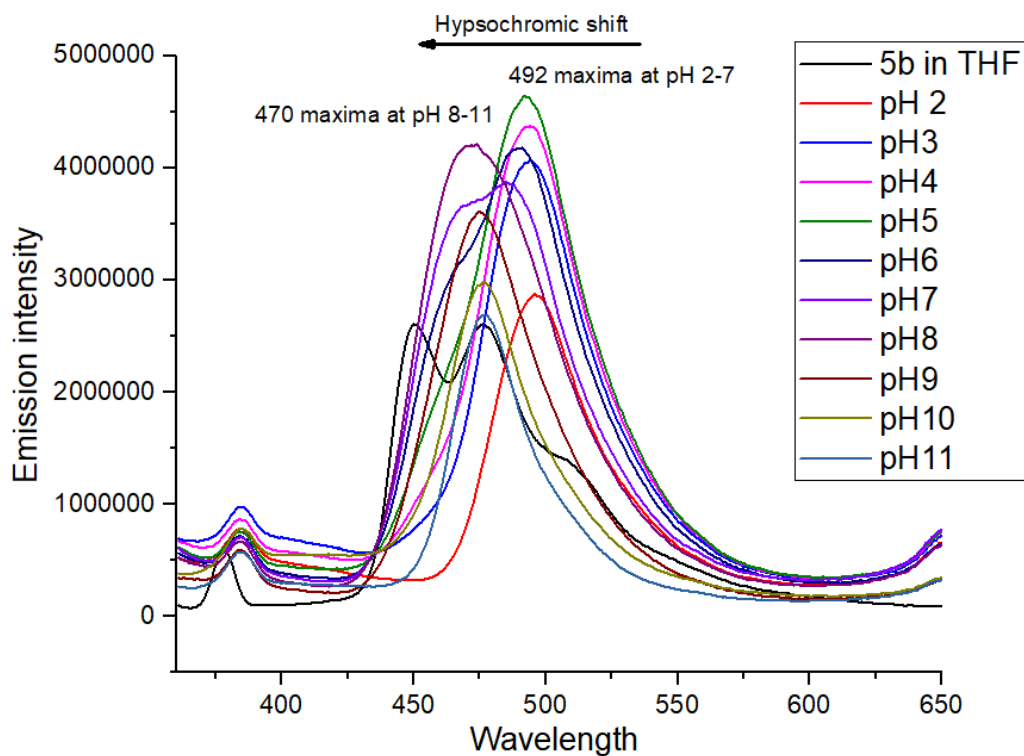

Spectrum S45. Emission intensity of **5b** in different pH with addition of 10 equiv of  $\text{Al}^{3+}$ ,  $\lambda_{\text{ex}} = 350 \text{ nm}$ ,  $\lambda_{\text{em}} = 570 \text{ nm}$

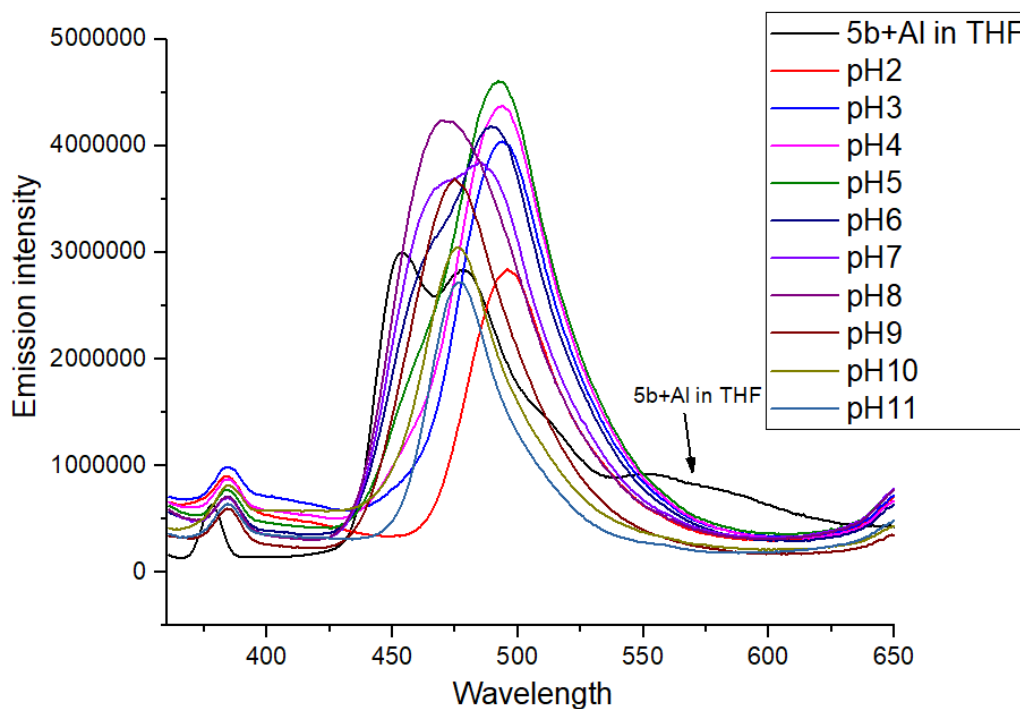

Spectrum S46. Emission intensity of **5b** in different pH with addition of 10 equiv of  $\text{Al}^{3+}$  and  $\text{Fe}^{3+}$ ,  $\lambda_{\text{ex}} = 350 \text{ nm}$ ,  $\lambda_{\text{em}} = 570 \text{ nm}$

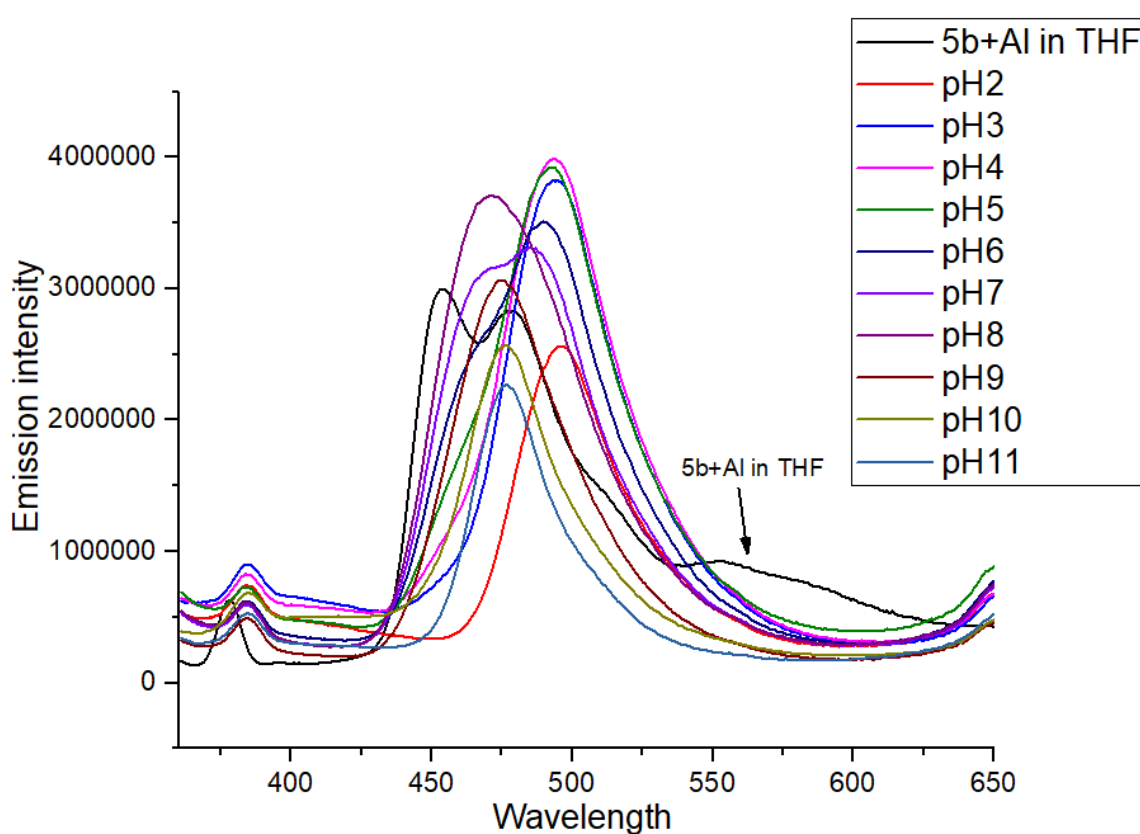

## 9. References

1. J. S. Renny, L.L. Tomasevich, E.H. Tallmadge, D.B. Collum, *Angew. Chemie Int. Ed.*, 2013, **52** (46), 11998–12013.
2. (a) R.L. Scott, *Recl. des Trav. Chim. des Pays-Bas*, 1956, **75** (7), 787–789. (b) A. Sahana, A. Banerjee, S. Lohar, S. Panja, S. Kanti Mukhopadhyay, J. Sanmartín Matalobos, D. Das, *Chem. Commun.*, 2013, **49** (65), 7231-7233.
